# Supplementary material for: Rational design of visible and NIR distyryl-BODIPY dyes from a novel fluorinated platform
Source: Royal Society of Chemistry journal article supplement (doi:10.1039/c004812g), 2010-01-01
Supplement: c004812g.pdf [file c004812g.pdf]

## Supporting information

### Novel di styryl BODIPY NIR derivatives

*Olivier Galangau, Cécile Dumas-Verdes, Rachel Méallet-Renault, Gilles Clavier*

PPSM, ENS Cachan, CNRS, UniverSud, 61 av President Wilson, F-94230 CACHAN, France

### 1. NMR spectra

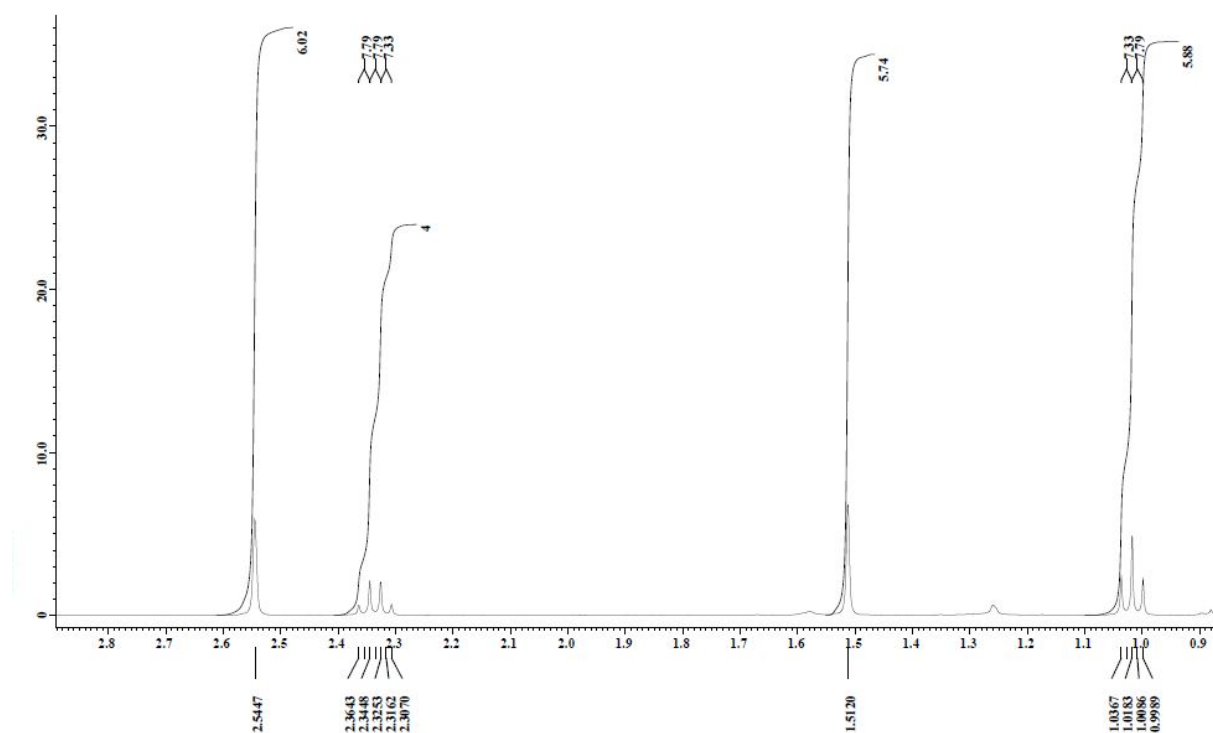

**Figure S1**  $^1\text{H}$  NMR spectra of compound 1

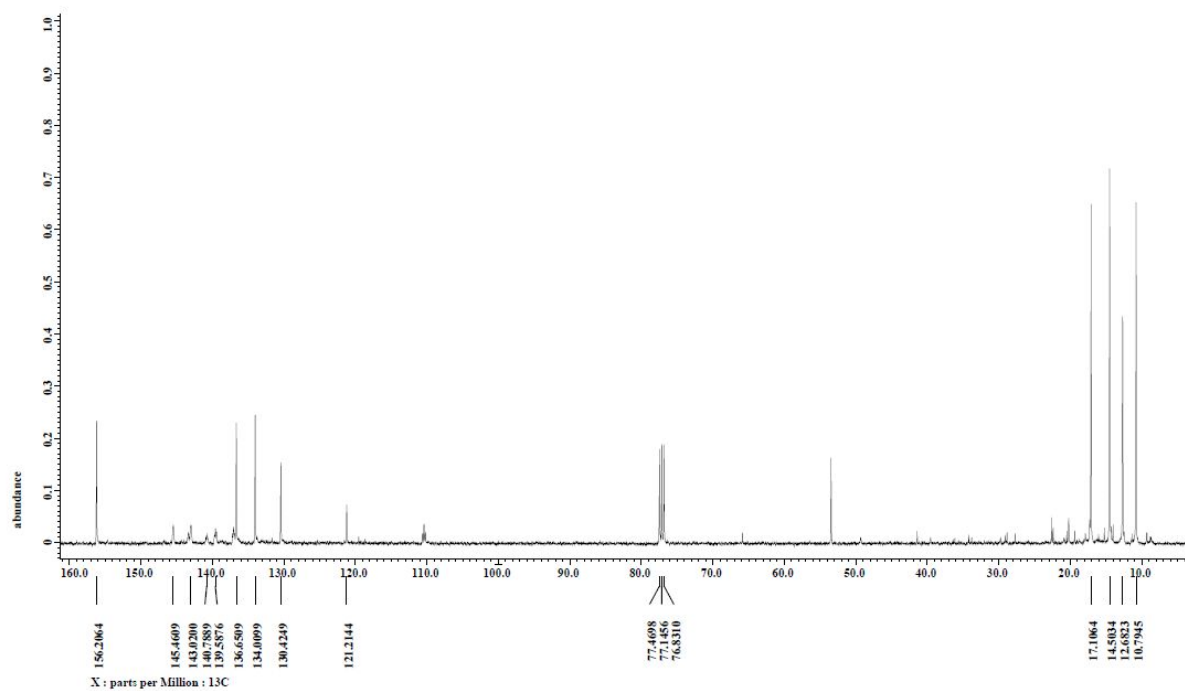

Figure S2 <sup>13</sup>C NMR spectra of compound 1

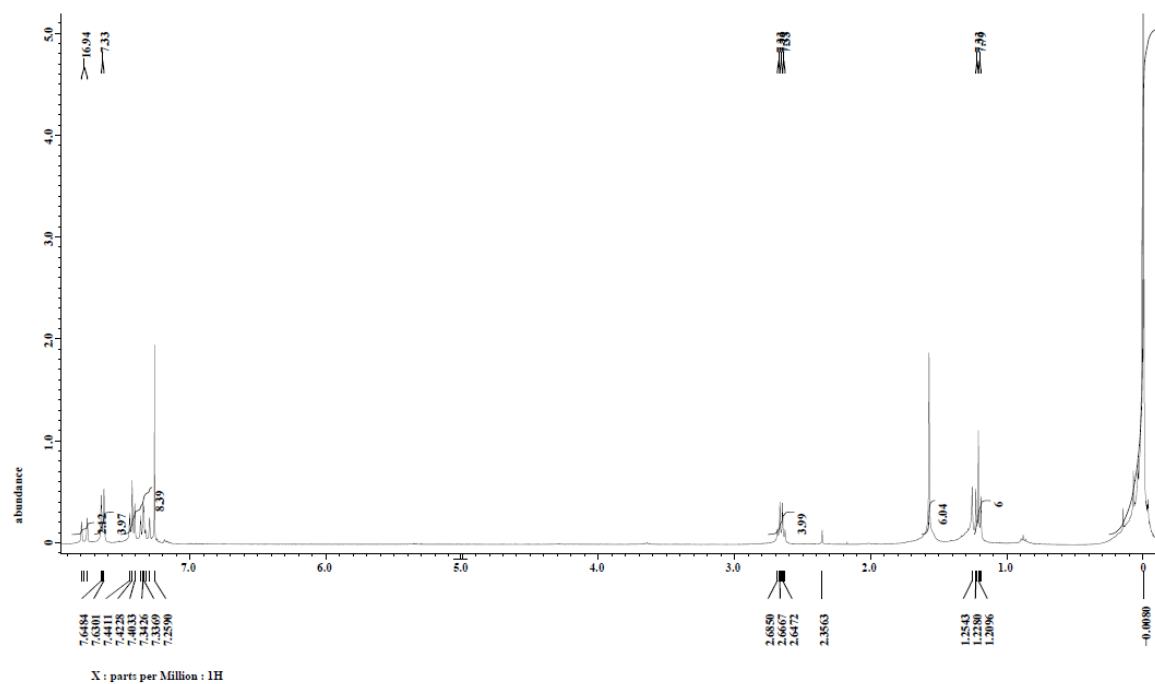

Figure S3 <sup>1</sup>H NMR spectra of compound 4a

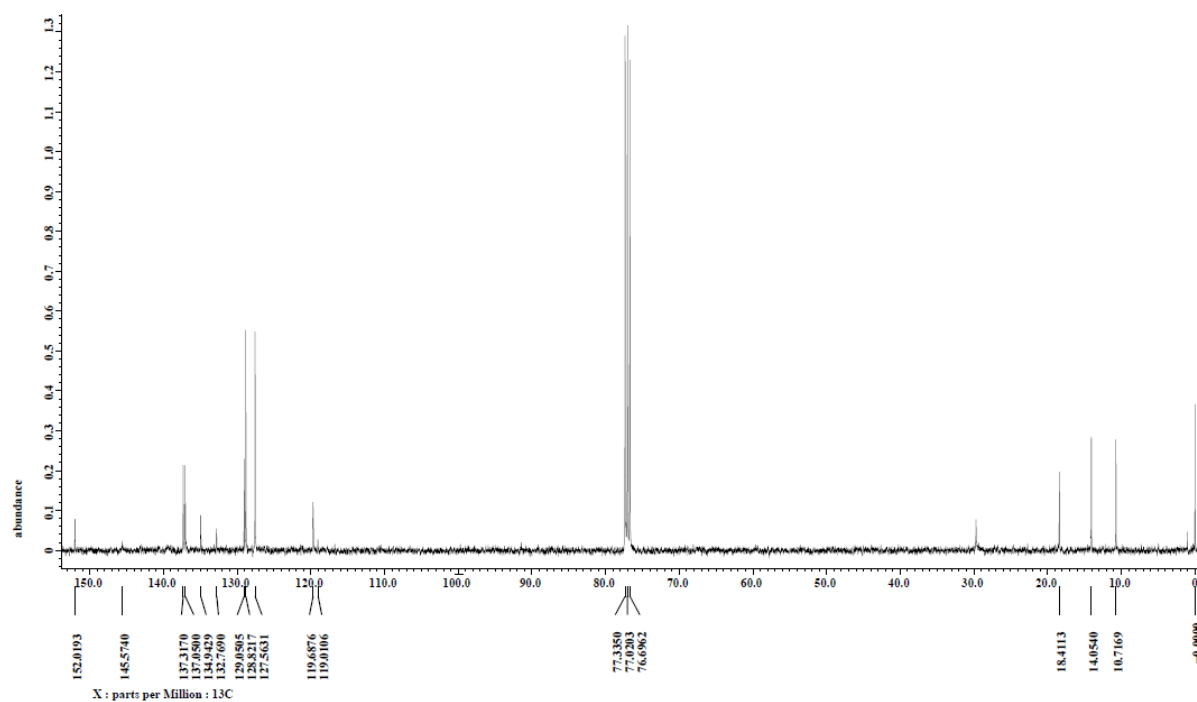

Figure S4  $^{13}\text{C}$  NMR spectra of compound 4a

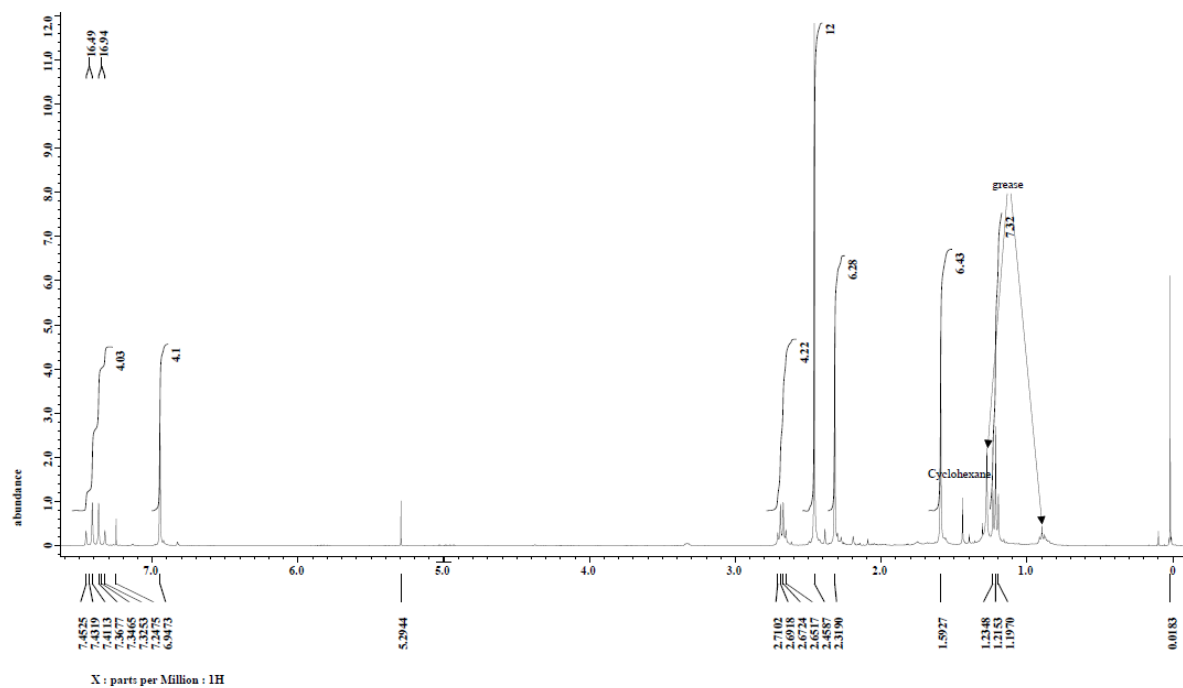

Figure S5  $^1\text{H}$  NMR spectra of compound 4b

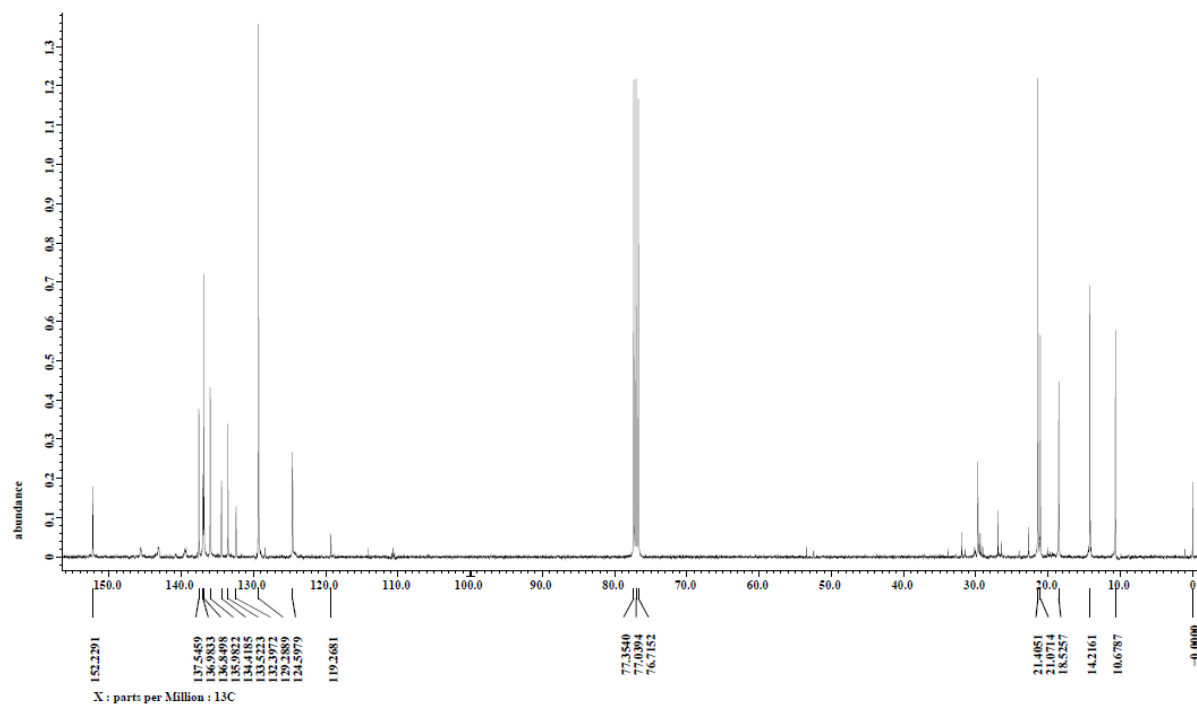

Figure S6 <sup>13</sup>C NMR spectra of compound 4b

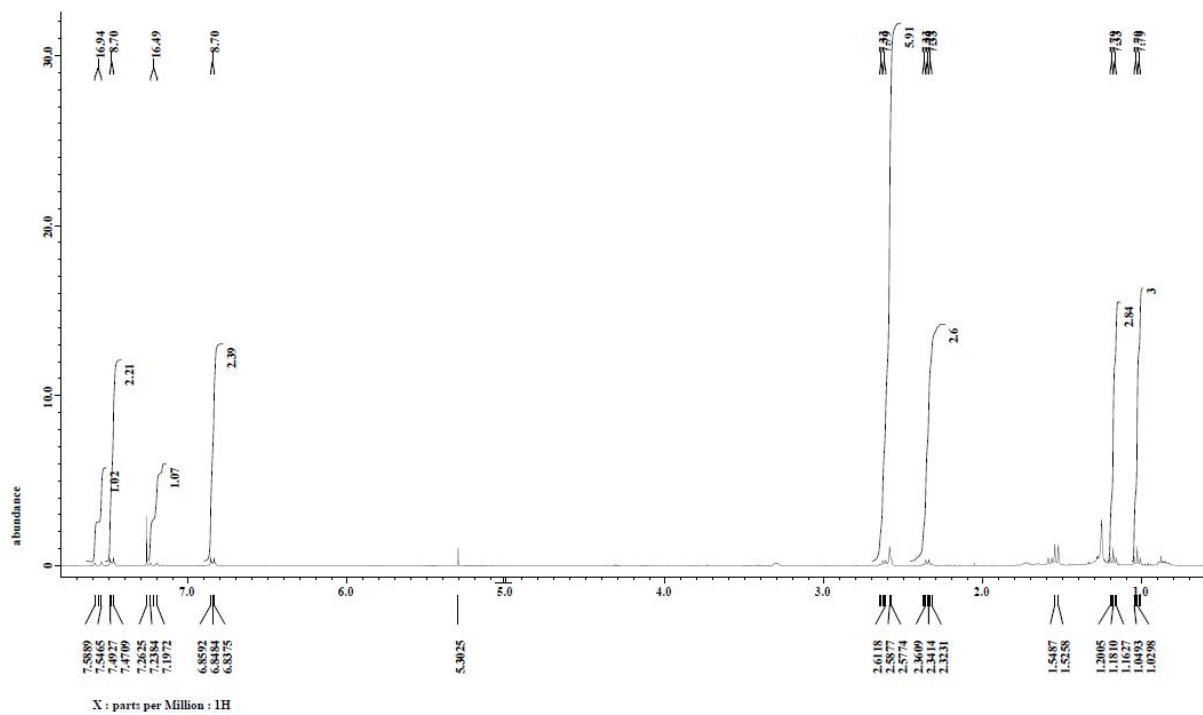

Figure S7 <sup>1</sup>H NMR spectra of compound 3c

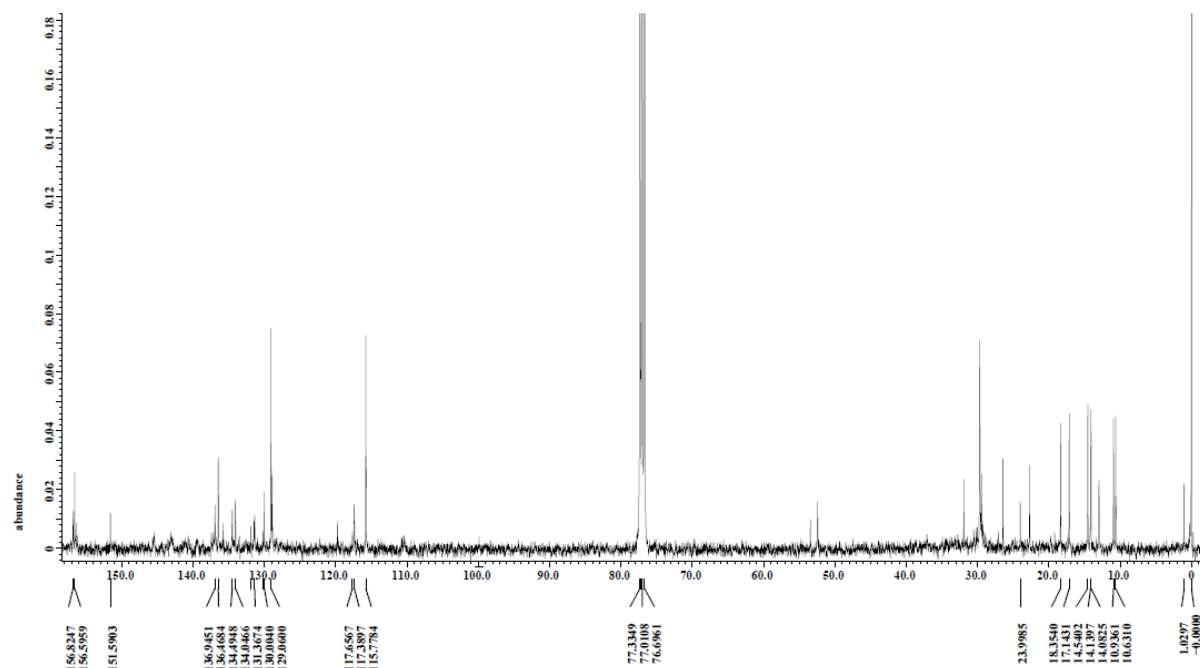

Figure S8  $^{13}\text{C}$  NMR spectra of compound 3c

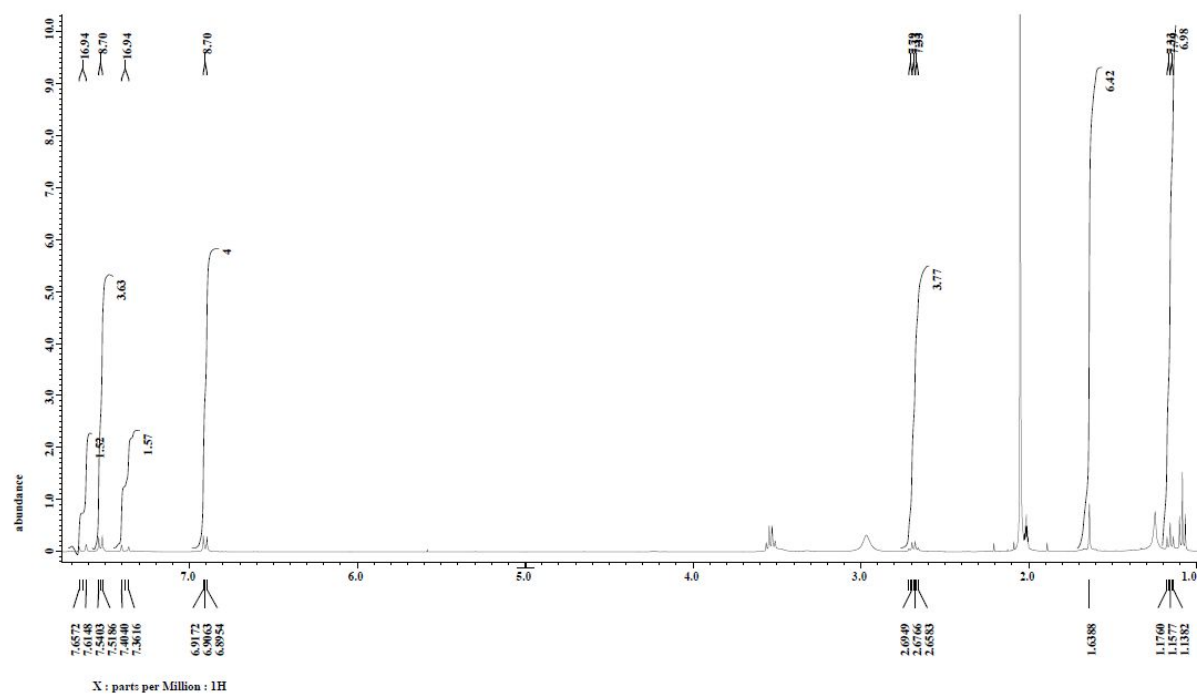

Figure S9  $^1\text{H}$  NMR spectra of compound 4c

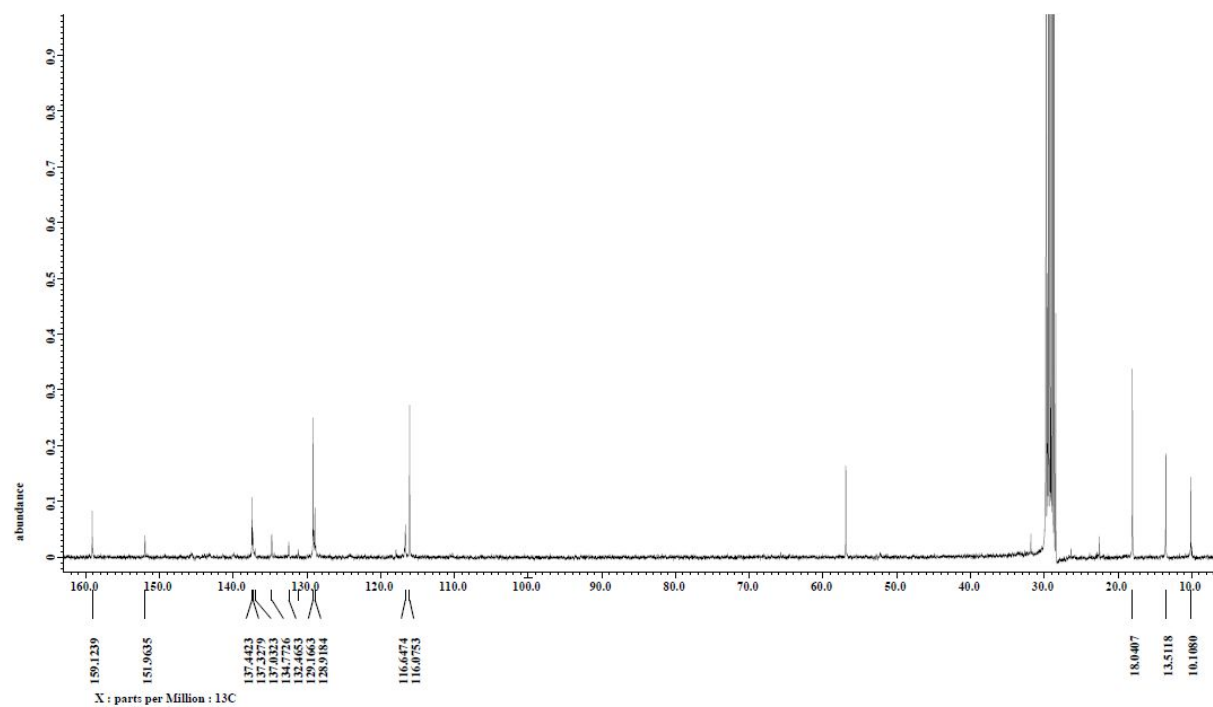

Figure S10 <sup>13</sup>C NMR spectra of compound 4c

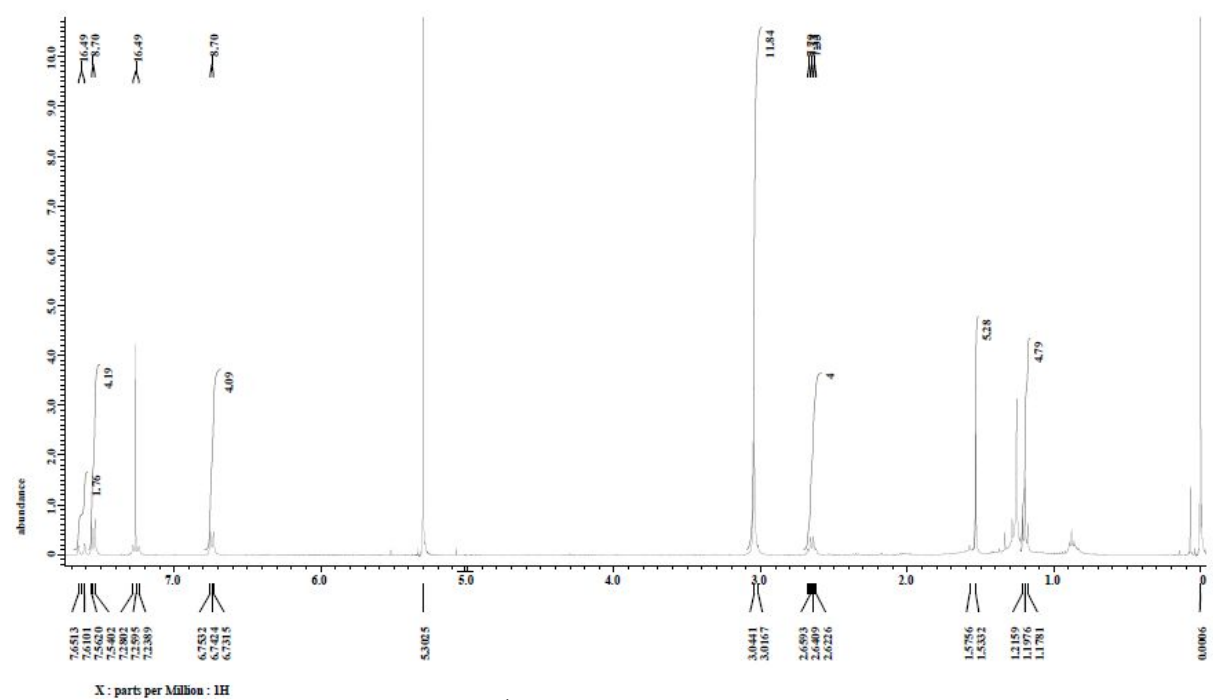

Figure S11 <sup>1</sup>H NMR spectra of compound 4d

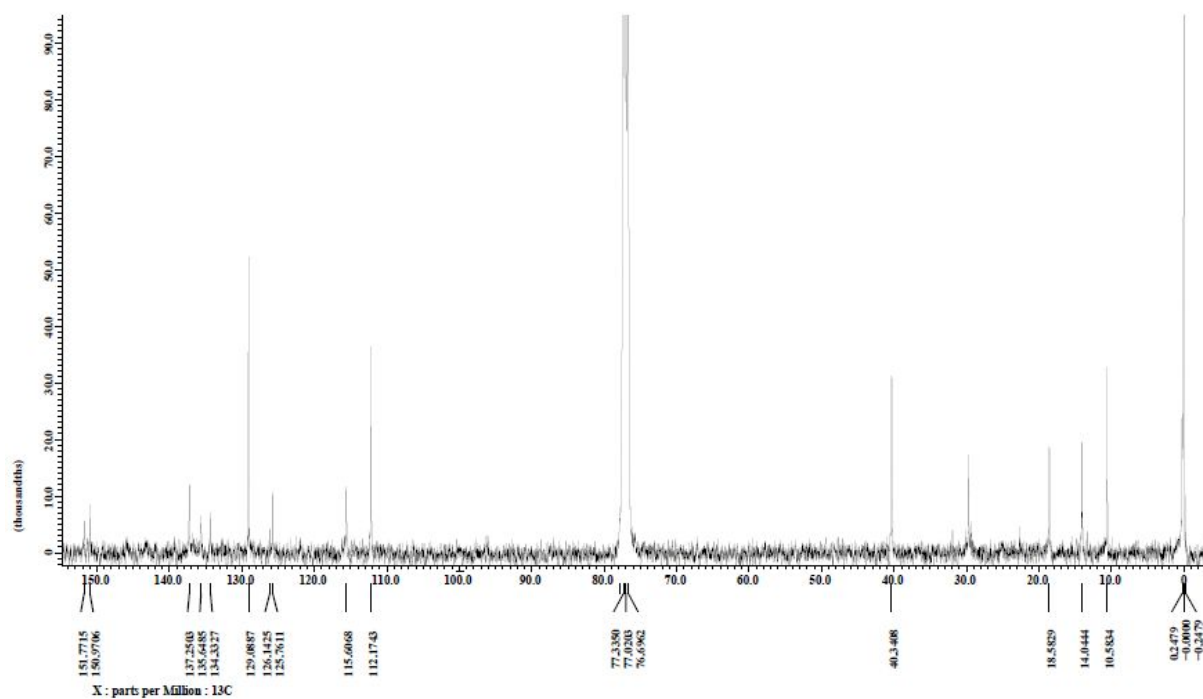

Figure S12  $^{13}\text{C}$  NMR spectra of compound 4d

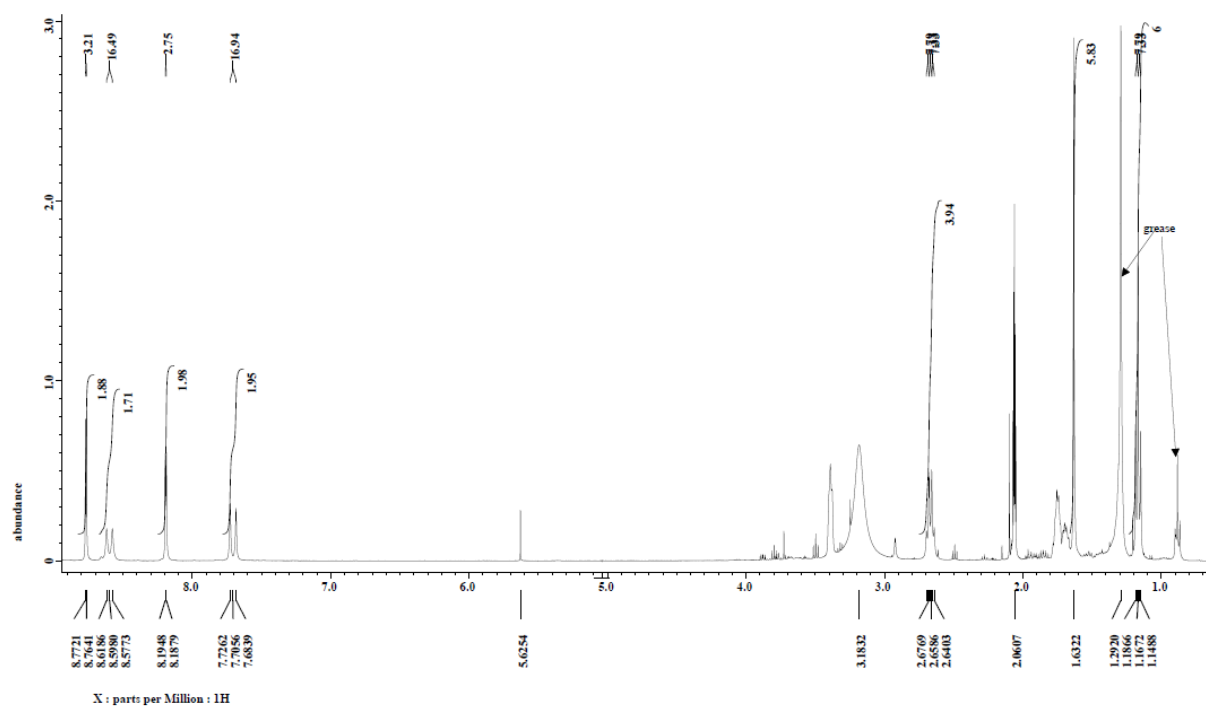

Figure S13  $^1\text{H}$  NMR spectra of compound 4e

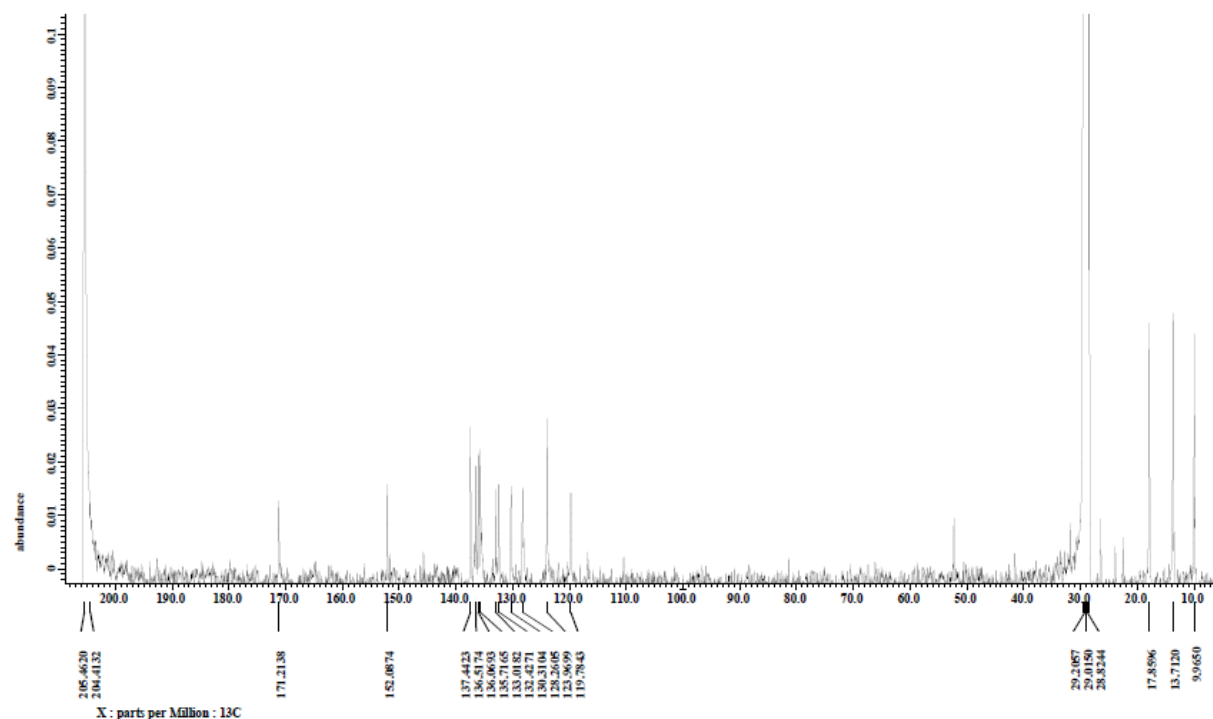

Figure S14  $^{13}\text{C}$  NMR spectra of compound 4e

## 2. Spectroscopic results

### 2.1. Absorption and fluorescence excitation spectra

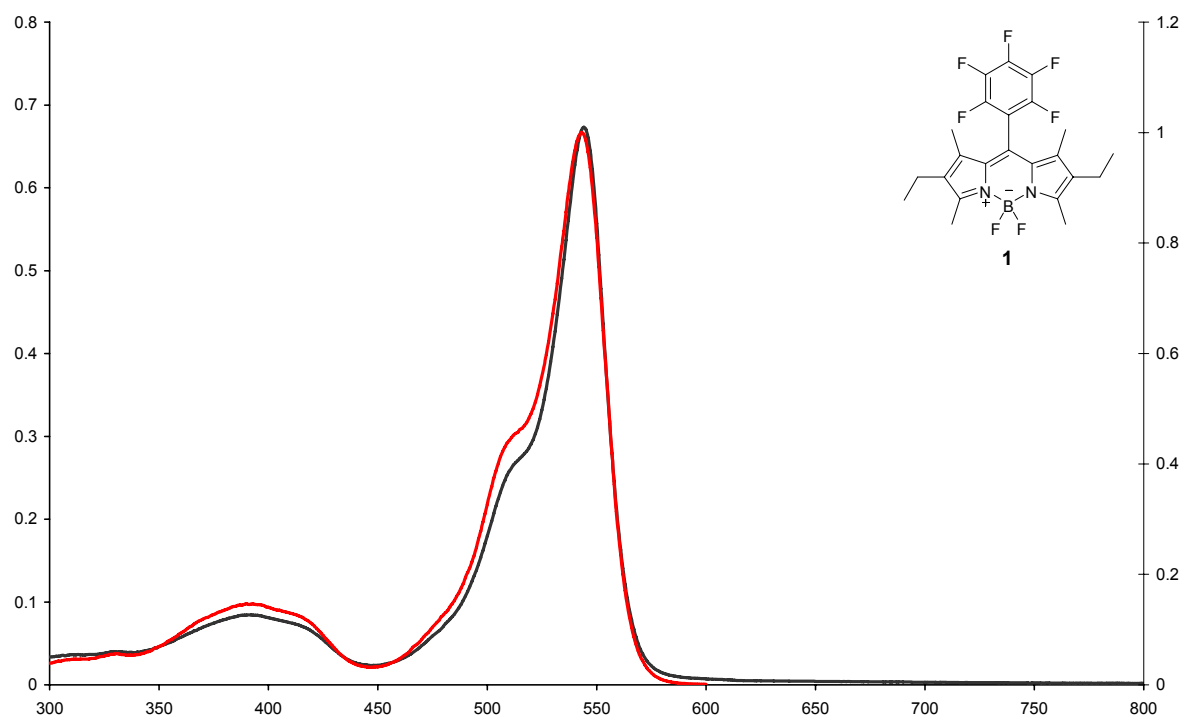

Figure S15 Absorption (black) and fluorescence excitation (red) spectra of compound 1.



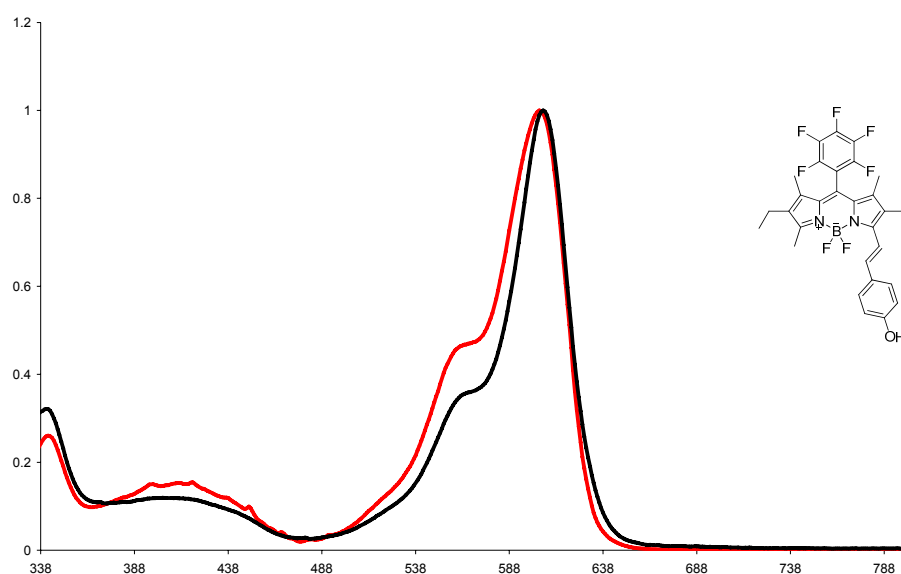

**Figure S16** Absorption (black) and fluorescence excitation (red) spectra of compound **3c**.

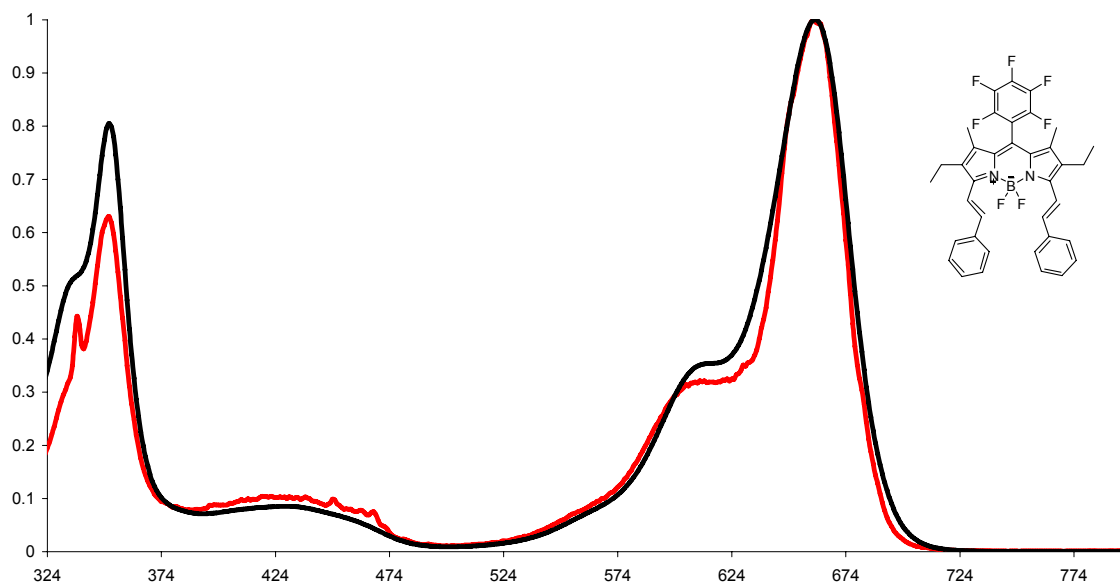

**Figure S17** Absorption (black) and fluorescence excitation (red) spectra of compound **4a**.

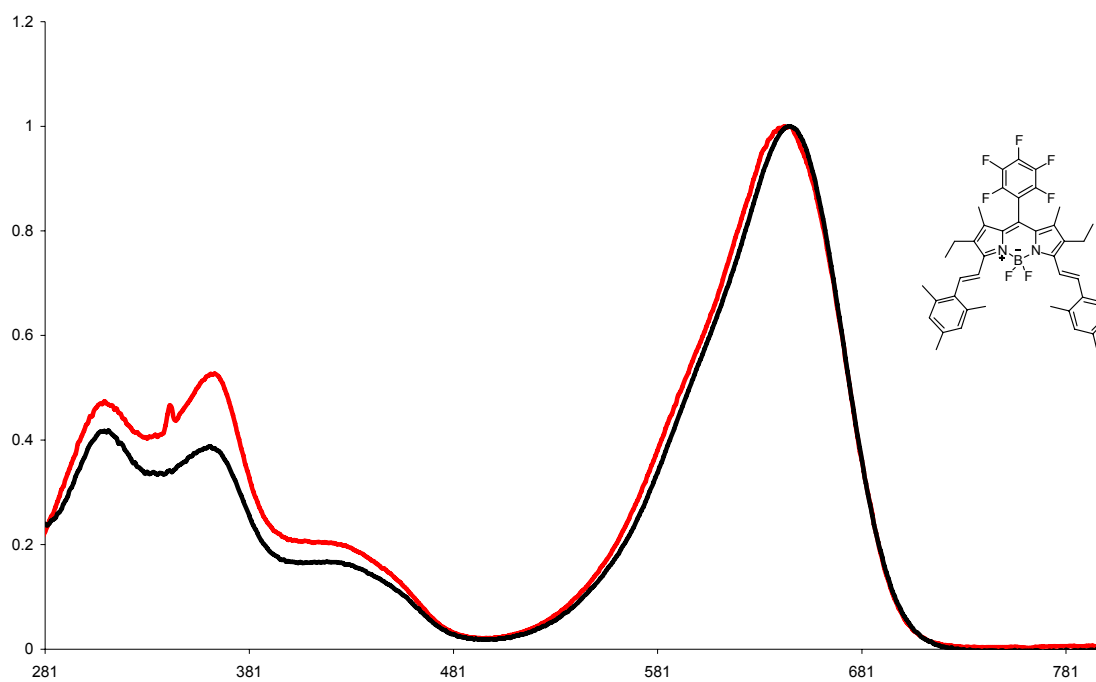

**Figure S18** Absorption (black) and fluorescence excitation (red) spectra of compound **4b**.

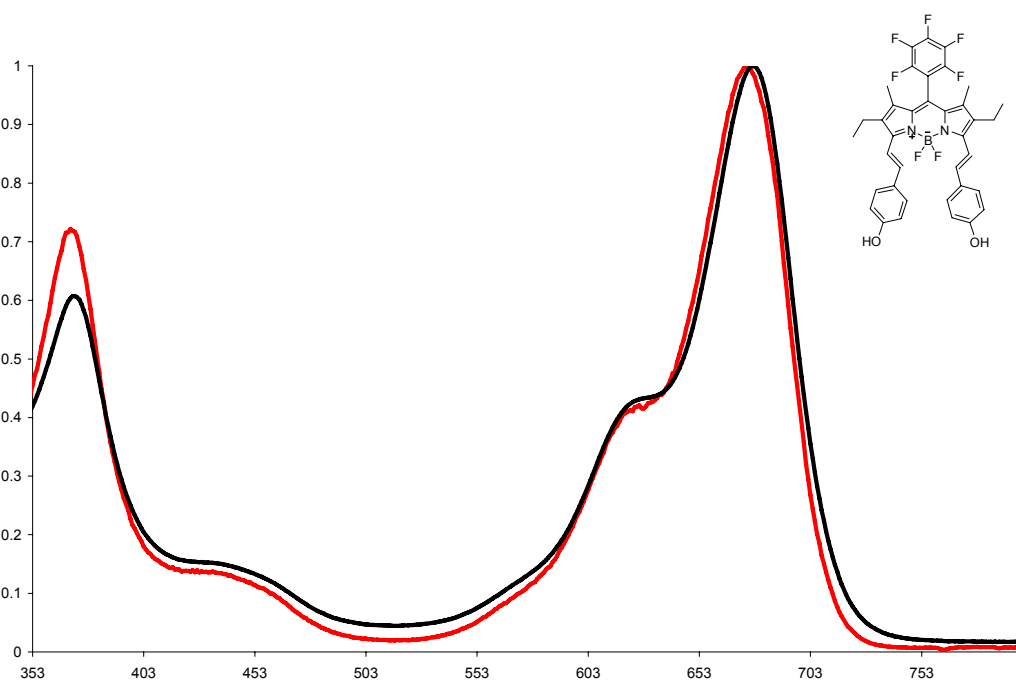

**Figure S19** Absorption (black) and fluorescence excitation (red) spectra of compound **4c** (red, solid).

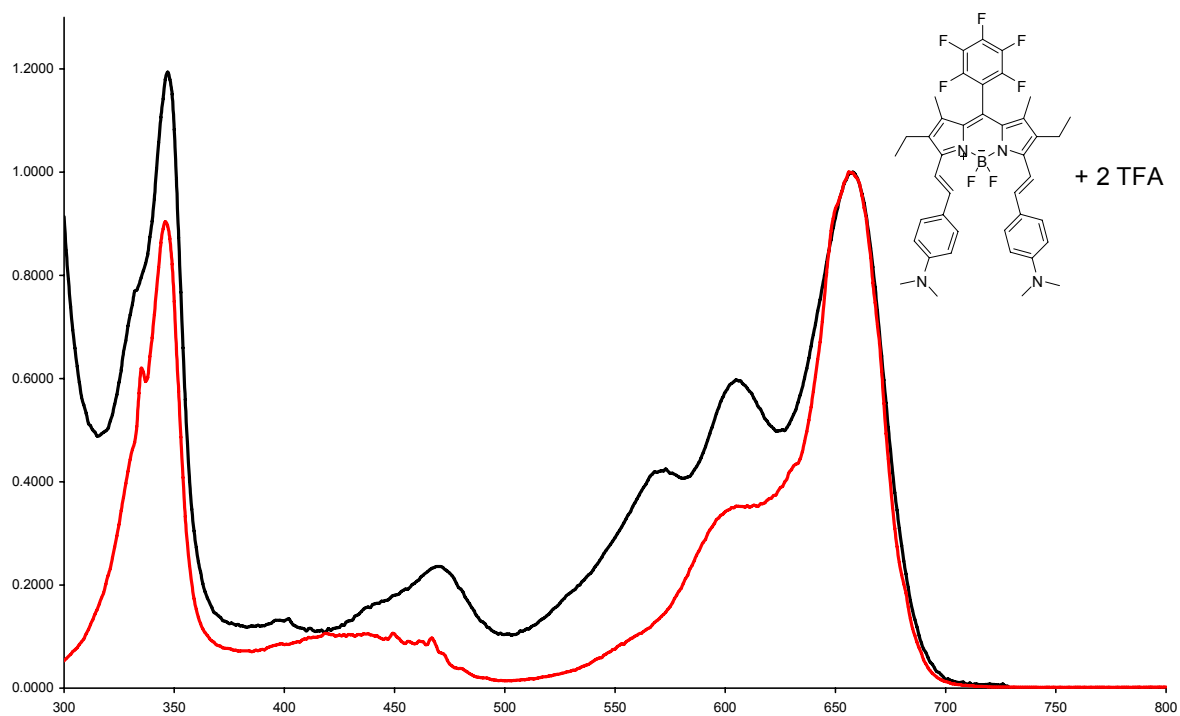

**Figure S20:** absorption (black) and fluorescence (red) excitation spectra of compound **4d** + 2H<sup>+</sup>.

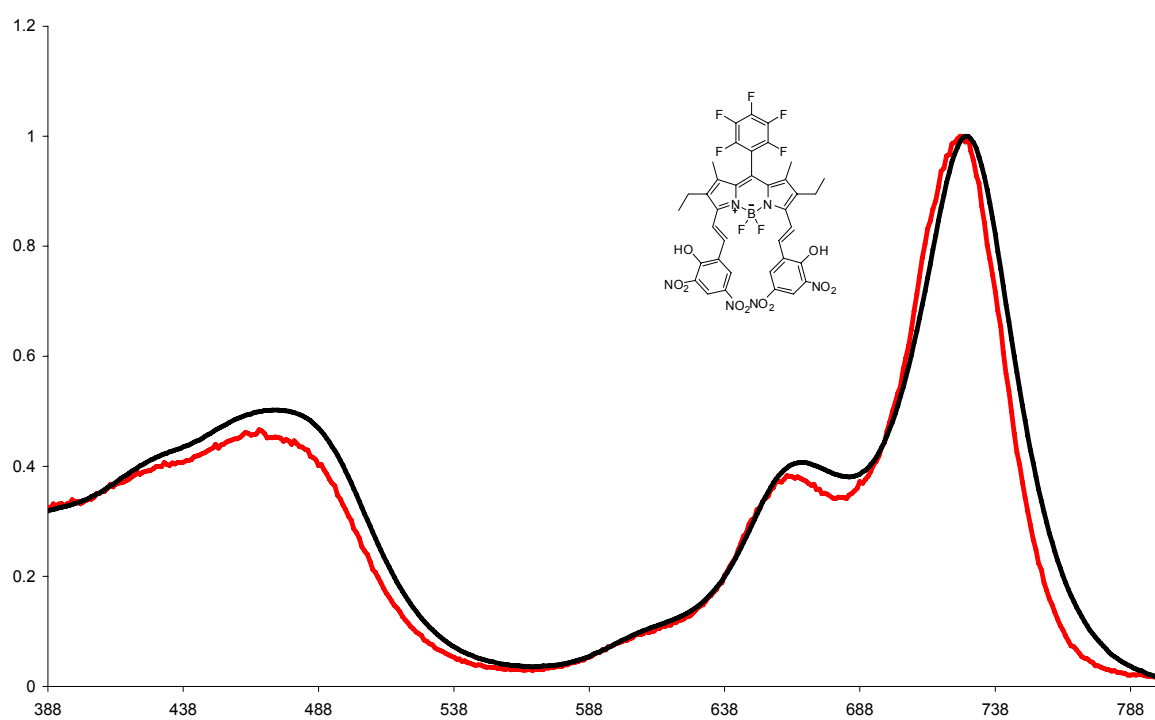

**Figure S21** absorption (black) and fluorescence (red) excitation spectra of compound **4e**.

## 2.2. Solvatochromism

According to Catalán treatment,<sup>1</sup> the observable (here the absorption wavenumber) can be fitted with 4 independent solvent parameters according to the equation:

$$\bar{\nu} = \bar{\nu}^{\circ} + aSP + bSdP + cSA + dSB$$

where  $\bar{\nu}$  is the measured wavenumber,  $\bar{\nu}^{\circ}$  the gas phase wavenumber, SP the solvent polarizability, SdP the solvent dipolarity, SA the solvent acidity, SB the solvent basicity and a, b, c and d are the regression coefficients describing the sensitivity of  $\bar{\nu}$  to the different parameters.

The equation was solved by minimizing the value:

$$\sum_i (\bar{\nu}_{\text{exp}} - \bar{\nu}_{\text{calc}})_i^2$$

where  $\bar{\nu}_{\text{exp}}$  is the experimental value  $\bar{\nu}_{\text{calc}}$  is the calculated value using the Catalán equation and i is the solvent with the solver of Excel software and keeping  $\bar{\nu}^{\circ}$ , a, b, c and d equal for all solvents.

### 4a

| Solvent            | Wavelength (nm) | $\bar{\nu}_{\text{exp}}$ (cm <sup>-1</sup> ) | SP    | SdP   | SA    | SB    |
|--------------------|-----------------|----------------------------------------------|-------|-------|-------|-------|
| acetonitrile       | 653             | 15314                                        | 0.645 | 0.974 | 0.044 | 0.286 |
| methanol           | 654             | 15291                                        | 0.608 | 0.904 | 0.605 | 0.545 |
| cyclohexane        | 656             | 15244                                        | 0.683 |       |       | 0.073 |
| dichloromethane    | 661             | 15129                                        | 0.761 | 0.769 | 0.04  | 0.178 |
| dimethyl sulfoxide | 663             | 15083                                        | 0.83  | 1     | 0.072 | 0.647 |
| toluene            | 664             | 15060                                        | 0.782 | 0.284 |       | 0.128 |

The best fit found is:

$$\bar{\nu} = 16337 - 1636.6 \times SP - 1.5 \times SdP - 249.9 \times SA + 187.5 \times SB$$

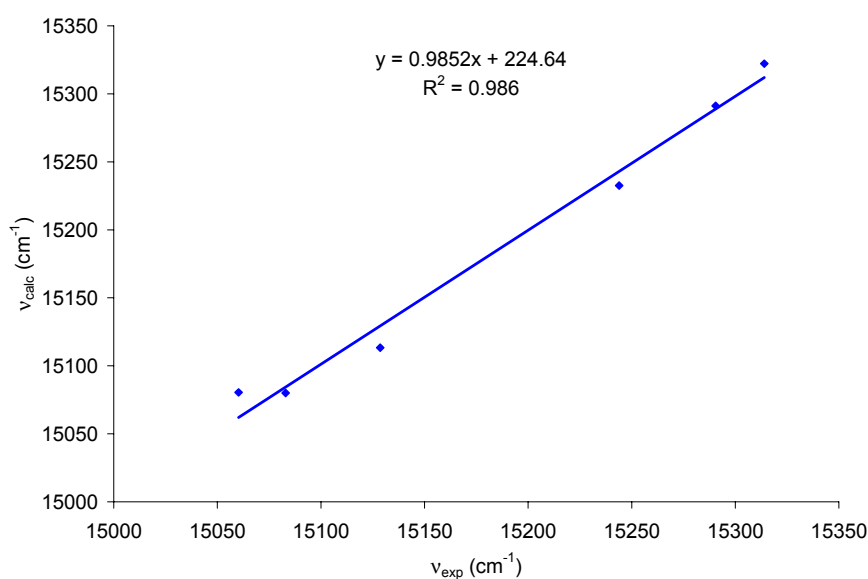

Figure S22  $\bar{\nu}_{\text{calc}} = f(\bar{\nu}_{\text{exp}})$  plot for 4a.

#### 4b

| Solvent            | Wavelength (nm) | $\bar{\nu}_{\text{exp}}$ ( $\text{cm}^{-1}$ ) | SP    | SdP   | SA    | SB    |
|--------------------|-----------------|-----------------------------------------------|-------|-------|-------|-------|
| methanol           | 590             | 16949                                         | 0.608 | 0.904 | 0.605 | 0.545 |
| acetonitrile       | 603             | 16584                                         | 0.645 | 0.974 | 0.044 | 0.286 |
| cyclohexane        | 642             | 15576                                         | 0.683 |       |       | 0.073 |
| tetrahydrofuran    | 644             | 15528                                         | 0.714 | 0.634 |       | 0.591 |
| dichloromethane    | 646             | 15480                                         | 0.761 | 0.769 | 0.04  | 0.178 |
| dimethyl sulfoxide | 649             | 15408                                         | 0.83  | 1     | 0.072 | 0.647 |

The best fit found is:

$$\bar{\nu} = 19744 - 6194.7 \times SP + 821.5 \times SdP + 665.6 \times SA - 297.0 \times SB$$

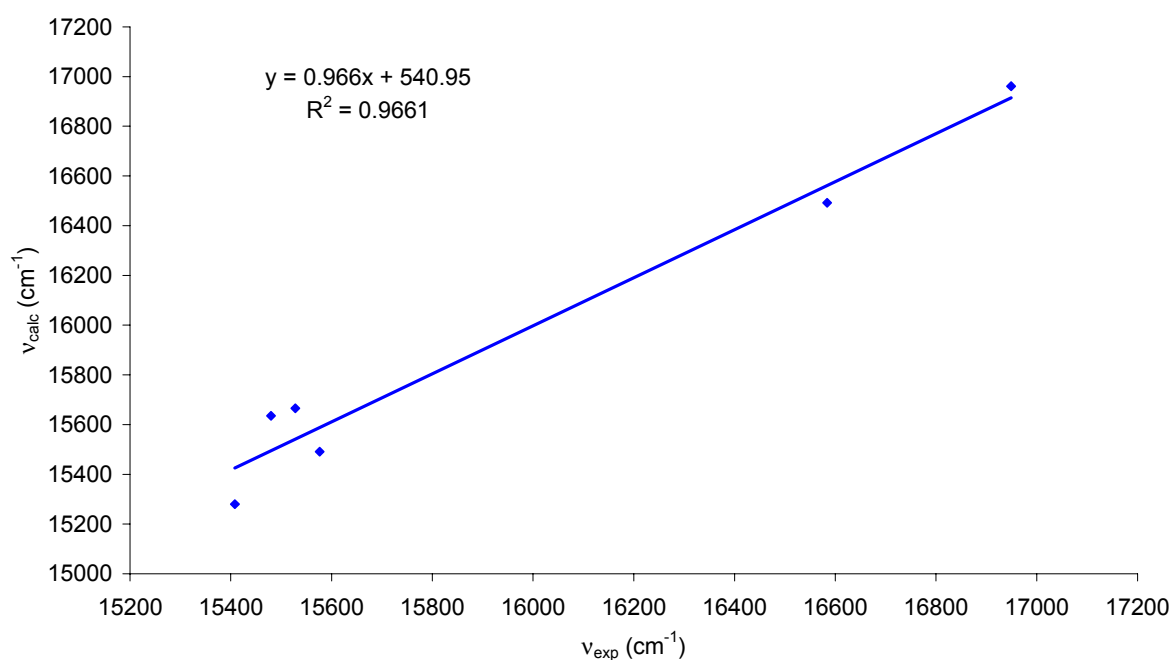

Figure S23  $\bar{\nu}_{\text{calc}} = f(\bar{\nu}_{\text{exp}})$  plot for 4b.

### 3. Molecular modelling

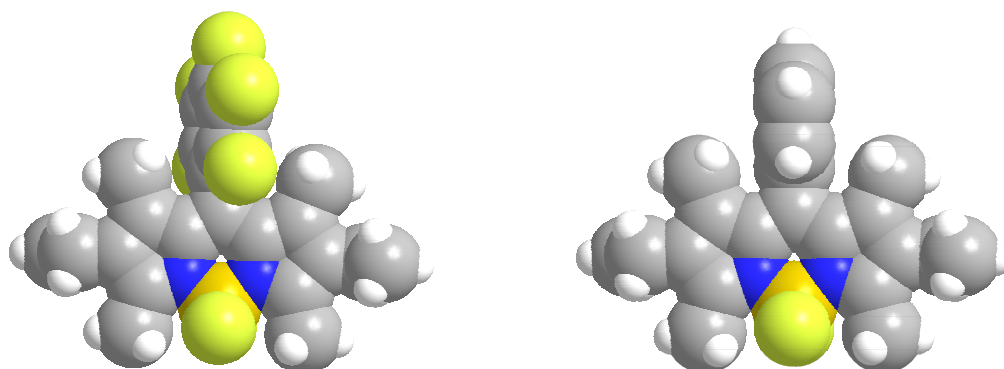

Figure S24 optimized geometry (B3LYP/6-31g(d)) of BODIPY 4e (left) and a model non fluorinated BODIPY (right).

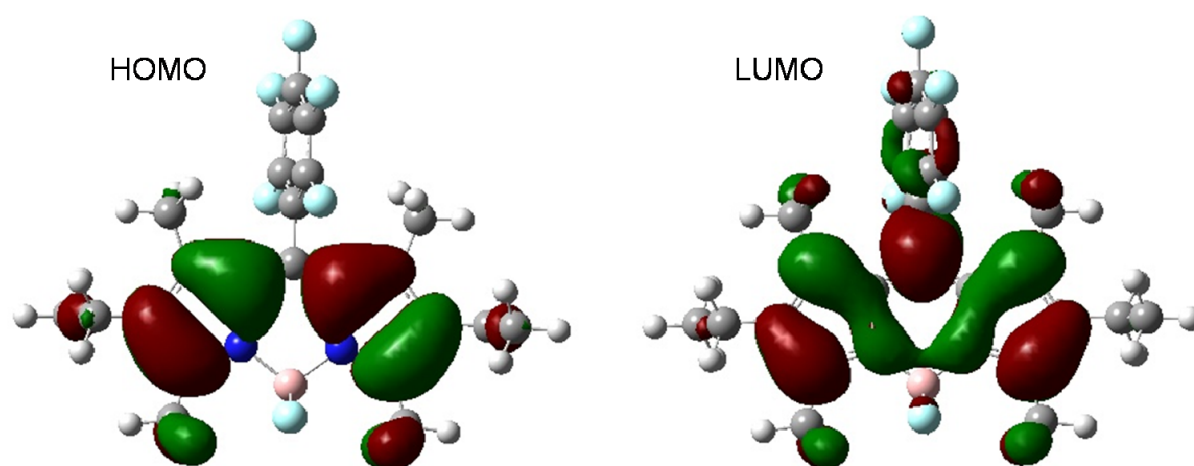

Figure S25 HOMO (left) and LUMO (right) of BODIPY 1 (B3LYP/ 6-31g(d)).

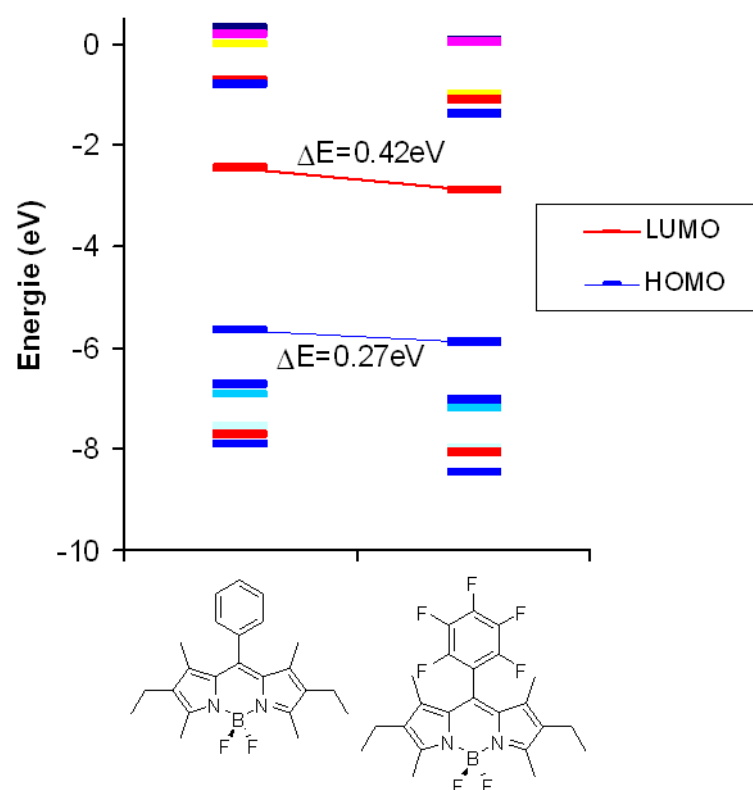

Figure S26 calculated energy (PBE0/6-311+g(d,p)) of the molecular orbital for BODIPY 4e and its non fluorinated model.

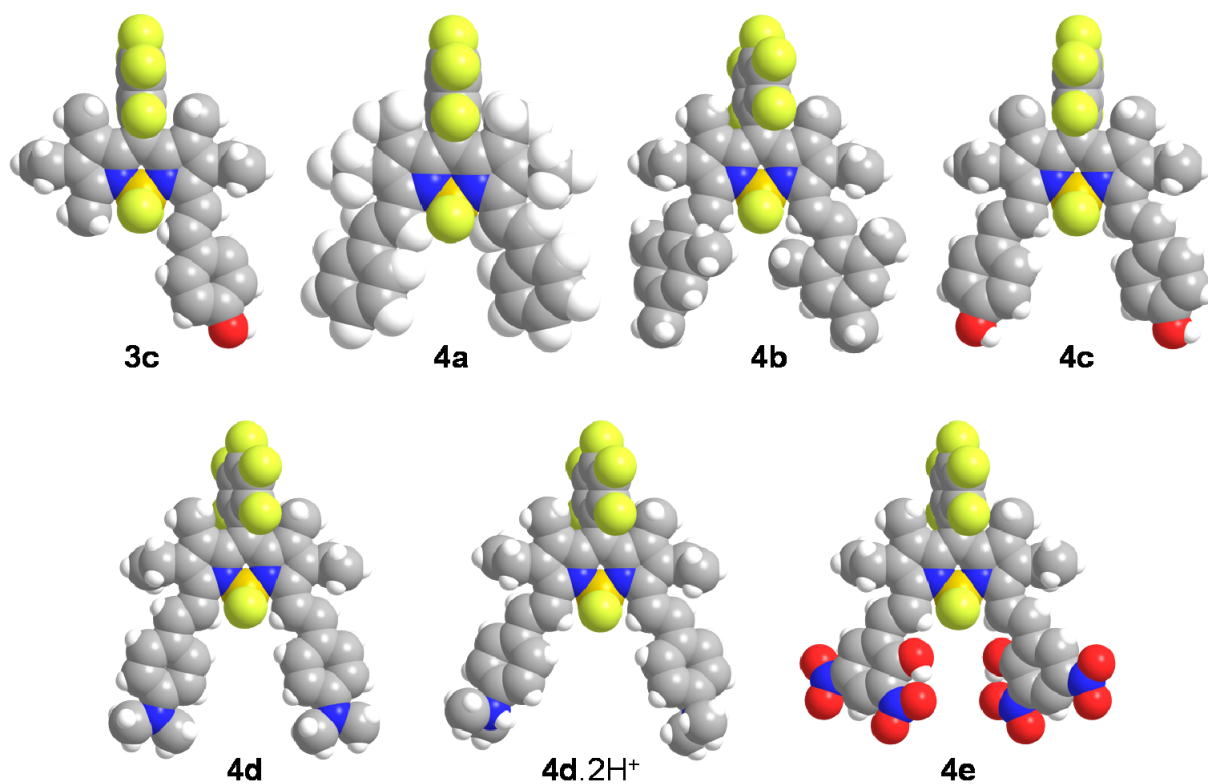

Figure S27 optimized geometry (B3LYP/ 6-31g(d)) of styryl-BODIPY.

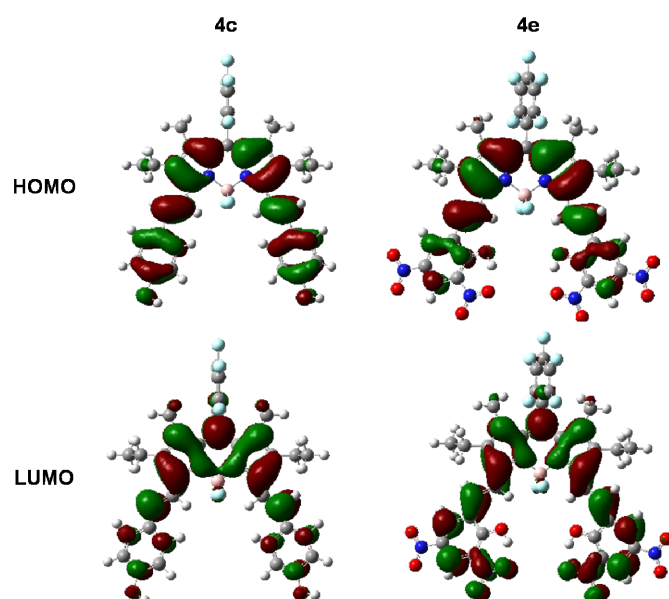

Figure S28 HO (upper) and LUMOs (bottom) of styryl BODIPY 4c and 4e (B3LYP/ 6-31g(d)).

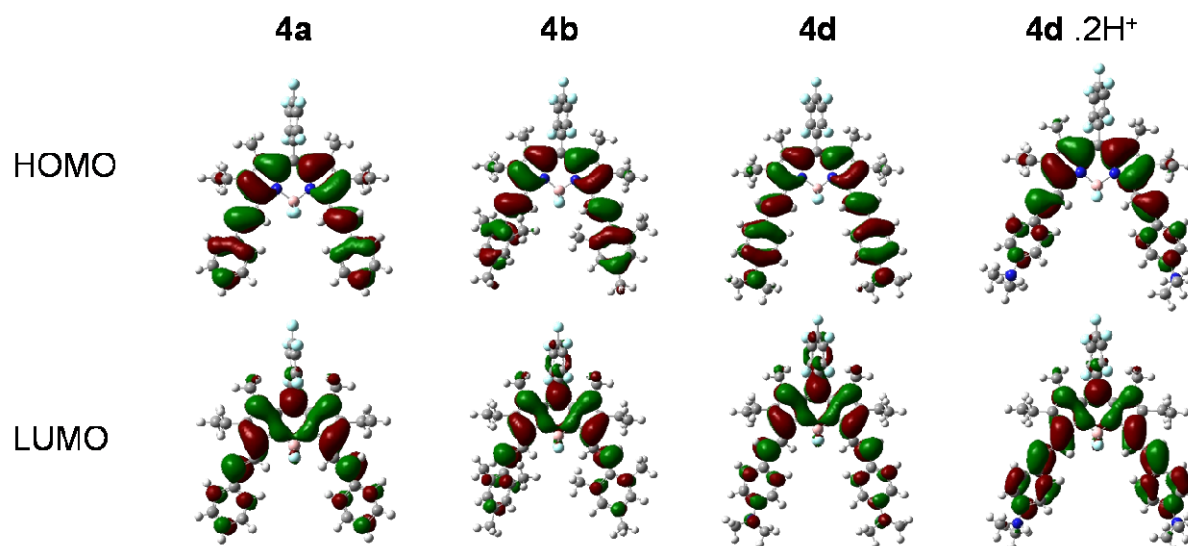

Figure S29 HO (upper) and LUMOs (bottom) of styryl BODIPY **4a**, **4b**, **4d** and **4d.2H<sup>+</sup>** (B3LYP/ 6-31g(d)).

### Cartesian coordinates of the optimised structures

1

| Atomic number | X         | Y         | Z         |
|---------------|-----------|-----------|-----------|
| 6             | -1.524441 | -0.000415 | 0.000004  |
| 6             | -2.252883 | -0.435438 | -1.109546 |
| 6             | -3.645346 | -0.439322 | -1.122408 |
| 6             | -4.34397  | -0.000806 | 0.000109  |
| 6             | -3.645378 | 0.437871  | 1.122589  |
| 6             | -2.25292  | 0.434403  | 1.109629  |
| 6             | -0.031391 | -0.000088 | -0.000049 |
| 6             | 0.651659  | 1.215276  | -0.171523 |
| 6             | 2.46288   | 2.500803  | -0.354377 |
| 6             | 1.33874   | 3.358067  | -0.490569 |
| 6             | 0.652253  | -1.215093 | 0.171391  |
| 6             | 0.19814   | -2.561678 | 0.375974  |
| 7             | 2.047944  | -1.233316 | 0.169796  |
| 6             | 1.340331  | -3.357569 | 0.490457  |
| 6             | 2.464063  | -2.499752 | 0.354413  |
| 7             | 2.047336  | 1.234149  | -0.169856 |
| 6             | 0.196925  | 2.561631  | -0.376156 |
| 9             | -1.612881 | 0.888016  | 2.195722  |
| 9             | -4.312292 | 0.868521  | 2.198387  |
| 9             | -5.678409 | -0.000099 | 0.000169  |
| 9             | -4.3122   | -0.870169 | -2.19816  |
| 9             | -1.6128   | -0.8889   | -2.195696 |
| 5             | 2.983519  | 0.000668  | 0.000062  |
| 9             | 3.776642  | 0.16105   | 1.134124  |
| 9             | 3.776942  | -0.159274 | -1.133887 |
| 6             | 3.91476   | 2.853222  | -0.392219 |
| 1             | 4.43489   | 2.242896  | -1.137146 |
| 1             | 4.059497  | 3.909922  | -0.62688  |
| 1             | 4.384811  | 2.636298  | 0.573421  |
| 6             | 1.403016  | -4.848506 | 0.688185  |
| 1             | 2.299302  | -5.104839 | 1.266219  |
| 1             | 0.555095  | -5.176217 | 1.302137  |



|   |           |           |           |
|---|-----------|-----------|-----------|
| 6 | 1.408668  | -5.646713 | -0.62917  |
| 1 | 2.26846   | -5.37447  | -1.251439 |
| 1 | 1.45843   | -6.724147 | -0.433444 |
| 1 | 0.503205  | -5.448534 | -1.213463 |
| 6 | -1.212105 | -3.071668 | 0.446757  |
| 1 | -1.840913 | -2.477265 | 1.116913  |
| 1 | -1.691675 | -3.073563 | -0.539763 |
| 1 | -1.225873 | -4.102205 | 0.812052  |
| 6 | -1.21354  | 3.070985  | -0.447143 |
| 1 | -1.842188 | 2.475898  | -1.116828 |
| 1 | -1.69302  | 3.073341  | 0.53943   |
| 1 | -1.227763 | 4.101278  | -0.81311  |
| 6 | 1.400747  | 4.84903   | -0.688365 |
| 1 | 2.296959  | 5.105749  | -1.266339 |
| 1 | 0.552725  | 5.176329  | -1.302395 |
| 6 | 1.405944  | 5.647306  | 0.628953  |
| 1 | 2.265835  | 5.375496  | 1.251273  |
| 1 | 1.455207  | 6.724752  | 0.433171  |
| 1 | 0.500547  | 5.448736  | 1.213216  |
| 6 | 3.916105  | -2.851476 | 0.392388  |
| 1 | 4.386166  | -2.634203 | -0.573182 |
| 1 | 4.435855  | -2.240984 | 1.137451  |
| 1 | 4.061333  | -3.908143 | 0.626943  |

### 3c

| Atomic number | X         | Y         | Z         |
|---------------|-----------|-----------|-----------|
| 6             | 2.931093  | -0.59642  | 0.022393  |
| 6             | 3.494741  | -1.066803 | 1.202551  |
| 6             | 4.759504  | -1.634111 | 1.234889  |
| 6             | 5.490843  | -1.738992 | 0.061048  |
| 6             | 4.954042  | -1.277499 | -1.131546 |
| 6             | 3.687936  | -0.71238  | -1.136902 |
| 6             | 1.581862  | 0.024691  | 0.012585  |
| 6             | 1.486404  | 1.413178  | 0.121843  |
| 6             | 0.396203  | 3.338887  | 0.213571  |
| 6             | 1.77477   | 3.646833  | 0.286715  |
| 6             | 0.451658  | -0.787237 | -0.106133 |
| 6             | 0.343241  | -2.198573 | -0.310064 |
| 7             | -0.825549 | -0.245495 | -0.078771 |
| 6             | -1.005858 | -2.478343 | -0.420673 |
| 6             | -1.717135 | -1.25067  | -0.25692  |
| 6             | -3.150882 | -1.189964 | -0.285985 |
| 1             | -3.597743 | -2.126353 | -0.606696 |
| 7             | 0.23926   | 2.009902  | 0.116471  |
| 6             | 2.46961   | 2.441641  | 0.229146  |
| 9             | 3.201289  | -0.279148 | -2.295075 |
| 9             | 5.654205  | -1.377905 | -2.25362  |
| 9             | 6.69886   | -2.279337 | 0.078962  |
| 9             | 5.273291  | -2.076228 | 2.374758  |
| 9             | 2.81861   | -0.98072  | 2.342693  |
| 5             | -1.116531 | 1.269759  | 0.090281  |
| 9             | -1.888216 | 1.741114  | -0.970229 |
| 9             | -1.782449 | 1.507262  | 1.303535  |

|   |           |           |           |
|---|-----------|-----------|-----------|
| 6 | -3.978479 | -0.180024 | 0.062346  |
| 1 | -3.55597  | 0.740501  | 0.44454   |
| 6 | -5.428452 | -0.211267 | 0.008991  |
| 6 | -6.175279 | -1.262071 | -0.543689 |
| 6 | -6.141041 | 0.8767    | 0.538948  |
| 6 | -7.557818 | -1.23336  | -0.553885 |
| 1 | -5.672113 | -2.116294 | -0.983885 |
| 6 | -7.523189 | 0.917593  | 0.53594   |
| 1 | -5.585346 | 1.706336  | 0.965374  |
| 6 | -8.240509 | -0.142693 | -0.011372 |
| 1 | -8.115607 | -2.058034 | -0.991135 |
| 1 | -8.063721 | 1.761311  | 0.949774  |
| 8 | -9.592852 | -0.063317 | 0.003372  |
| 1 | -9.966594 | -0.848084 | -0.40454  |
| 6 | -0.753382 | 4.277332  | 0.228352  |
| 1 | -1.518347 | 3.938263  | 0.930546  |
| 1 | -0.429553 | 5.2807    | 0.507157  |
| 1 | -1.223649 | 4.324306  | -0.758904 |
| 6 | -1.634782 | -3.822029 | -0.615798 |
| 1 | -2.504577 | -3.732348 | -1.275537 |
| 1 | -0.936919 | -4.473589 | -1.150576 |
| 6 | -2.051844 | -4.490178 | 0.695864  |
| 1 | -2.772548 | -3.873156 | 1.239787  |
| 1 | -2.508985 | -5.467053 | 0.51182   |
| 1 | -1.187348 | -4.636916 | 1.349586  |
| 6 | 1.439027  | -3.208611 | -0.394462 |
| 1 | 2.149136  | -2.983658 | -1.194706 |
| 1 | 2.005161  | -3.278324 | 0.538915  |
| 1 | 1.025196  | -4.198303 | -0.593707 |
| 6 | 3.95535   | 2.306977  | 0.261511  |
| 1 | 4.293842  | 1.603412  | 1.02661   |
| 1 | 4.355588  | 1.966644  | -0.699149 |
| 1 | 4.416484  | 3.272769  | 0.476749  |
| 6 | 2.350798  | 5.024797  | 0.369708  |
| 1 | 1.670061  | 5.67116   | 0.93382   |
| 1 | 3.278076  | 4.999652  | 0.951959  |
| 6 | 2.626139  | 5.649063  | -0.999313 |
| 1 | 1.707484  | 5.724322  | -1.588395 |
| 1 | 3.046478  | 6.654134  | -0.897428 |
| 1 | 3.33328   | 5.041362  | -1.571425 |

#### 4a

| Atomic number | X         | Y         | Z         |
|---------------|-----------|-----------|-----------|
| 6             | -1.718895 | 2.562853  | -0.213021 |
| 6             | -0.597735 | 3.375711  | -0.284045 |
| 6             | 0.544491  | 2.523559  | -0.215868 |
| 7             | 0.128484  | 1.240062  | -0.118886 |
| 6             | -1.249733 | 1.21624   | -0.101267 |
| 6             | -1.249708 | -1.21631  | 0.101053  |
| 6             | -1.718869 | -2.562903 | 0.213055  |
| 7             | 0.128509  | -1.240128 | 0.118607  |
| 6             | -0.597711 | -3.375748 | 0.284207  |
| 6             | 0.544452  | -2.523616 | 0.215803  |

|   |           |           |           |
|---|-----------|-----------|-----------|
| 6 | -1.931289 | -0.000041 | -0.000112 |
| 5 | 1.050508  | -0.000048 | -0.000422 |
| 9 | 1.856594  | -0.113252 | -1.135752 |
| 9 | 1.857309  | 0.113143  | 1.134411  |
| 6 | -3.12912  | -3.048884 | 0.260384  |
| 1 | -3.734969 | -2.501896 | 0.986491  |
| 1 | -3.621177 | -2.962284 | -0.713985 |
| 1 | -3.155962 | -4.103944 | 0.538737  |
| 6 | -3.129142 | 3.048859  | -0.260229 |
| 1 | -3.735116 | 2.501753  | -0.986138 |
| 1 | -3.621049 | 2.962455  | 0.714235  |
| 1 | -3.155995 | 4.103869  | -0.538775 |
| 6 | -0.598847 | -4.862205 | 0.451971  |
| 1 | -1.44828  | -5.149528 | 1.080938  |
| 1 | 0.291777  | -5.164471 | 1.010665  |
| 6 | -0.678613 | -5.629987 | -0.869518 |
| 1 | -0.665464 | -6.710333 | -0.697109 |
| 1 | -1.598694 | -5.384876 | -1.407735 |
| 1 | 0.155797  | -5.379898 | -1.53126  |
| 6 | -0.59887  | 4.862198  | -0.451544 |
| 1 | -1.448216 | 5.149619  | -1.080586 |
| 1 | 0.291838  | 5.164574  | -1.010045 |
| 6 | -0.678837 | 5.629746  | 0.870068  |
| 1 | -0.666246 | 6.710123  | 0.697814  |
| 1 | -1.598721 | 5.384103  | 1.40838   |
| 1 | 0.155791  | 5.379977  | 1.531657  |
| 6 | -3.416084 | -0.000042 | -0.000052 |
| 6 | -4.139098 | 0.248156  | 1.160631  |
| 6 | -4.139196 | -0.248216 | -1.16068  |
| 6 | -5.525481 | 0.249385  | 1.174285  |
| 6 | -5.525579 | -0.2494   | -1.174228 |
| 6 | -6.22039  | 0.000006  | 0.000055  |
| 9 | -3.502234 | 0.493014  | 2.300839  |
| 9 | -6.189606 | 0.489521  | 2.296691  |
| 9 | -7.543571 | 0.000028  | 0.000106  |
| 9 | -6.189799 | -0.489512 | -2.296583 |
| 9 | -3.502427 | -0.493095 | -2.300938 |
| 6 | 1.949394  | 2.823244  | -0.295486 |
| 6 | 2.530194  | 4.012869  | -0.03814  |
| 1 | 2.571537  | 1.977638  | -0.566991 |
| 1 | 1.92006   | 4.844222  | 0.30052   |
| 6 | 3.954096  | 4.306626  | -0.130829 |
| 6 | 4.398624  | 5.587792  | 0.224606  |
| 6 | 4.909147  | 3.372543  | -0.5611   |
| 6 | 5.74213   | 5.928374  | 0.155644  |
| 1 | 3.672912  | 6.323426  | 0.560252  |
| 6 | 6.249723  | 3.712997  | -0.630036 |
| 1 | 4.601683  | 2.37226   | -0.846564 |
| 6 | 6.674534  | 4.991204  | -0.272735 |
| 1 | 6.061472  | 6.926687  | 0.436533  |
| 1 | 6.972453  | 2.976627  | -0.966353 |
| 1 | 7.726138  | 5.252198  | -0.329288 |
| 6 | 1.949425  | -2.823281 | 0.295281  |
| 6 | 2.530207  | -4.013058 | 0.038562  |

|   |          |           |           |
|---|----------|-----------|-----------|
| 1 | 2.571653 | -1.977511 | 0.566072  |
| 1 | 1.92008  | -4.844619 | -0.299589 |
| 6 | 3.954146 | -4.306656 | 0.131171  |
| 6 | 4.399011 | -5.5873   | -0.225721 |
| 6 | 4.908913 | -3.372904 | 0.56279   |
| 6 | 5.742595 | -5.927633 | -0.15706  |
| 1 | 3.67351  | -6.322701 | -0.562335 |
| 6 | 6.249565 | -3.713114 | 0.631438  |
| 1 | 4.601143 | -2.373115 | 0.849655  |
| 6 | 6.67473  | -4.990759 | 0.272552  |
| 1 | 6.062207 | -6.925524 | -0.439137 |
| 1 | 6.97207  | -2.977016 | 0.968835  |
| 1 | 7.72639  | -5.25157  | 0.328901  |

#### 4b

| Atomic number | X         | Y         | Z         |
|---------------|-----------|-----------|-----------|
| 6             | -2.451998 | 2.567613  | -0.237379 |
| 6             | -1.324332 | 3.385369  | -0.298676 |
| 6             | -0.183087 | 2.530395  | -0.242985 |
| 7             | -0.592843 | 1.242527  | -0.151393 |
| 6             | -1.982955 | 1.213845  | -0.127295 |
| 6             | -1.96134  | -1.227615 | 0.117398  |
| 6             | -2.406993 | -2.588999 | 0.232012  |
| 7             | -0.570935 | -1.232338 | 0.140493  |
| 6             | -1.265605 | -3.386927 | 0.296731  |
| 6             | -0.138816 | -2.512732 | 0.23672   |
| 6             | -2.658469 | -0.012949 | -0.00492  |
| 5             | 0.352772  | 0.013689  | -0.004598 |
| 9             | 1.153389  | -0.117895 | -1.140657 |
| 9             | 1.148228  | 0.159852  | 1.133166  |
| 6             | -3.813965 | -3.110462 | 0.286037  |
| 1             | -4.442101 | -2.550061 | 0.985072  |
| 1             | -4.298768 | -3.072448 | -0.697179 |
| 1             | -3.818992 | -4.156083 | 0.605934  |
| 6             | -3.86755  | 3.065395  | -0.290712 |
| 1             | -4.486893 | 2.493722  | -0.988439 |
| 1             | -4.350937 | 3.020637  | 0.692978  |
| 1             | -3.89009  | 4.110437  | -0.611893 |
| 6             | -4.151184 | -0.025724 | -0.003628 |
| 6             | -4.882171 | 0.353601  | 1.124729  |
| 6             | -4.877708 | -0.416938 | -1.130778 |
| 6             | -6.274567 | 0.34589   | 1.138832  |
| 6             | -6.270068 | -0.432039 | -1.142527 |
| 6             | -6.970918 | -0.048814 | -0.001267 |
| 9             | -6.93459  | -0.820865 | -2.235488 |
| 9             | -4.235053 | -0.817996 | -2.235936 |
| 9             | -8.305191 | -0.05975  | -0.000189 |
| 9             | -6.943509 | 0.723855  | 2.232903  |
| 9             | -4.244353 | 0.765316  | 2.22876   |
| 6             | 1.287478  | -2.795052 | 0.314546  |
| 6             | 1.910845  | -3.87812  | -0.182362 |
| 1             | 1.887466  | -2.005575 | 0.758838  |
| 1             | 1.332631  | -4.652039 | -0.688584 |

|   |           |           |           |
|---|-----------|-----------|-----------|
| 6 | 3.388428  | -4.064555 | -0.127847 |
| 6 | 3.981602  | -4.788725 | 0.924781  |
| 6 | 4.188994  | -3.545236 | -1.167865 |
| 6 | 5.369015  | -4.968764 | 0.928845  |
| 6 | 5.5711    | -3.74933  | -1.124082 |
| 6 | 6.182162  | -4.460109 | -0.086601 |
| 1 | 5.824172  | -5.52093  | 1.749076  |
| 1 | 6.186557  | -3.338562 | -1.922557 |
| 6 | 3.572376  | -2.76558  | -2.308897 |
| 1 | 2.865949  | -3.382091 | -2.880564 |
| 1 | 3.009928  | -1.89409  | -1.955591 |
| 1 | 4.344219  | -2.417452 | -3.002451 |
| 6 | 3.143492  | -5.363114 | 2.04513   |
| 1 | 2.598245  | -4.58107  | 2.586152  |
| 1 | 2.391141  | -6.068568 | 1.668423  |
| 1 | 3.768421  | -5.899263 | 2.766184  |
| 6 | 7.675894  | -4.689829 | -0.07956  |
| 1 | 8.040805  | -4.924464 | 0.925867  |
| 1 | 7.95404   | -5.528274 | -0.732356 |
| 1 | 8.218794  | -3.80851  | -0.439202 |
| 6 | 1.238067  | 2.838847  | -0.320483 |
| 6 | 1.841868  | 3.920871  | 0.201722  |
| 1 | 1.850736  | 2.07007   | -0.78356  |
| 1 | 1.249299  | 4.666186  | 0.733914  |
| 6 | 3.316277  | 4.132689  | 0.152347  |
| 6 | 3.912321  | 4.811657  | -0.929109 |
| 6 | 4.116767  | 3.632159  | 1.200633  |
| 6 | 5.299592  | 4.988622  | -0.937806 |
| 6 | 5.499938  | 3.830968  | 1.150895  |
| 6 | 6.112605  | 4.504139  | 0.090429  |
| 1 | 5.755701  | 5.518458  | -1.772242 |
| 1 | 6.114294  | 3.44443   | 1.962046  |
| 6 | 3.076233  | 5.355067  | -2.066465 |
| 1 | 2.54463   | 4.556495  | -2.596856 |
| 1 | 2.31272   | 6.058441  | -1.709576 |
| 1 | 3.701155  | 5.883632  | -2.793116 |
| 6 | 3.497324  | 2.881966  | 2.359494  |
| 1 | 2.785913  | 3.509989  | 2.91216   |
| 1 | 2.940051  | 2.000095  | 2.023334  |
| 1 | 4.266462  | 2.553039  | 3.065313  |
| 6 | 7.613142  | 4.677589  | 0.042187  |
| 1 | 7.894788  | 5.592489  | -0.490399 |
| 1 | 8.044037  | 4.725268  | 1.048101  |
| 1 | 8.094923  | 3.838384  | -0.477631 |
| 6 | -1.223833 | -4.883684 | 0.450174  |
| 1 | -0.26594  | -5.172254 | 0.895996  |
| 1 | -1.994876 | -5.199173 | 1.165133  |
| 6 | -1.428392 | -5.654231 | -0.868052 |
| 1 | -1.379084 | -6.735933 | -0.698049 |
| 1 | -2.403294 | -5.425278 | -1.312394 |
| 1 | -0.663913 | -5.391057 | -1.607606 |
| 6 | -1.307419 | 4.883394  | -0.44433  |
| 1 | -2.075703 | 5.18921   | -1.166581 |
| 1 | -0.349433 | 5.19106   | -0.876939 |

|   |           |          |          |
|---|-----------|----------|----------|
| 6 | -1.540746 | 5.64275  | 0.875601 |
| 1 | -0.779068 | 5.390202 | 1.621732 |
| 1 | -1.510415 | 6.726095 | 0.711822 |
| 1 | -2.515683 | 5.392613 | 1.308252 |

#### 4c

| Atomic number | X         | Y         | Z         |
|---------------|-----------|-----------|-----------|
| 6             | 2.098956  | 2.565556  | 0.125977  |
| 6             | 0.981429  | 3.383388  | 0.177092  |
| 6             | -0.165653 | 2.533266  | 0.144902  |
| 7             | 0.247998  | 1.245127  | 0.086326  |
| 6             | 1.625955  | 1.216953  | 0.066085  |
| 6             | 1.62091   | -1.219097 | -0.068509 |
| 6             | 2.088562  | -2.568982 | -0.127534 |
| 7             | 0.243098  | -1.241532 | -0.090701 |
| 6             | 0.967302  | -3.382544 | -0.179592 |
| 6             | -0.175734 | -2.528136 | -0.149192 |
| 6             | 2.305351  | -0.002055 | -0.00067  |
| 5             | -0.673744 | 0.003473  | -0.002002 |
| 9             | -1.483797 | -0.080896 | 1.135507  |
| 9             | -1.484005 | 0.0909    | -1.139054 |
| 6             | 3.500472  | -3.05282  | -0.145156 |
| 1             | 4.053793  | -2.680387 | -1.012117 |
| 1             | 4.048864  | -2.748034 | 0.750774  |
| 1             | 3.528509  | -4.142905 | -0.1842   |
| 6             | 3.512893  | 3.043204  | 0.14403   |
| 1             | 4.064082  | 2.668885  | 1.011533  |
| 1             | 4.060173  | 2.735191  | -0.751448 |
| 1             | 3.545762  | 4.133151  | 0.182149  |
| 6             | 0.970666  | -4.874597 | -0.291862 |
| 1             | 1.8453    | -5.186525 | -0.872192 |
| 1             | 0.105172  | -5.195693 | -0.879325 |
| 6             | 0.988908  | -5.593458 | 1.059031  |
| 1             | 0.964658  | -6.679474 | 0.927034  |
| 1             | 1.892743  | -5.341899 | 1.621384  |
| 1             | 0.135773  | -5.305709 | 1.680372  |
| 6             | 0.990715  | 4.875505  | 0.288152  |
| 1             | 1.869778  | 5.184629  | 0.863169  |
| 1             | 0.130114  | 5.200402  | 0.880642  |
| 6             | 1.003854  | 5.593023  | -1.063527 |
| 1             | 0.984032  | 6.679164  | -0.932277 |
| 1             | 1.903801  | 5.337767  | -1.630427 |
| 1             | 0.146277  | 5.307952  | -1.679901 |
| 6             | 3.790679  | -0.005318 | 0.000554  |
| 6             | 4.514915  | 0.034149  | -1.184892 |
| 6             | 4.512724  | -0.048305 | 1.187199  |
| 6             | 5.901544  | 0.03185   | -1.19731  |
| 6             | 5.899322  | -0.052499 | 1.201953  |
| 6             | 6.595047  | -0.011937 | 0.002911  |
| 9             | 3.879704  | 0.076247  | -2.351098 |
| 9             | 6.567156  | 0.070566  | -2.343896 |
| 9             | 7.918582  | -0.015079 | 0.004044  |
| 9             | 6.562815  | -0.094437 | 2.349681  |

|   |           |           |           |
|---|-----------|-----------|-----------|
| 9 | 3.875361  | -0.087595 | 2.352374  |
| 6 | -1.567965 | 2.83404   | 0.216728  |
| 1 | -2.19281  | 1.980805  | 0.455036  |
| 6 | -1.579426 | -2.824262 | -0.22413  |
| 1 | -2.200468 | -1.971623 | -0.474519 |
| 6 | -2.168696 | -4.017189 | 0.006194  |
| 1 | -1.564536 | -4.861071 | 0.323209  |
| 6 | -2.153183 | 4.031369  | -0.002203 |
| 1 | -1.545749 | 4.878057  | -0.304831 |
| 6 | -3.574907 | 4.315396  | 0.092251  |
| 6 | -4.528842 | 3.373399  | 0.505356  |
| 6 | -4.036648 | 5.598123  | -0.240974 |
| 6 | -5.870947 | 3.698197  | 0.57739   |
| 1 | -4.221351 | 2.370104  | 0.77967   |
| 6 | -5.376533 | 5.935042  | -0.173439 |
| 1 | -3.319891 | 6.348287  | -0.563056 |
| 6 | -6.303584 | 4.981453  | 0.237762  |
| 1 | -6.591877 | 2.951795  | 0.902148  |
| 1 | -5.722653 | 6.928799  | -0.434085 |
| 6 | -3.590886 | -4.298769 | -0.091861 |
| 6 | -4.056996 | -5.570384 | 0.264747  |
| 6 | -4.541719 | -3.361754 | -0.532122 |
| 6 | -5.40161  | -5.900379 | 0.194803  |
| 1 | -3.346852 | -6.317743 | 0.607029  |
| 6 | -5.882908 | -3.678535 | -0.606991 |
| 1 | -4.225895 | -2.366856 | -0.827084 |
| 6 | -6.322536 | -4.952273 | -0.241836 |
| 1 | -6.611703 | -2.952791 | -0.950315 |
| 8 | -7.606205 | 5.350617  | 0.292348  |
| 1 | -8.138889 | 4.608303  | 0.587702  |
| 8 | -7.650626 | -5.205888 | -0.336086 |
| 1 | -5.735173 | -6.895196 | 0.479295  |
| 1 | -7.826218 | -6.108834 | -0.06077  |

#### 4d

| Atomic number | X         | Y         | Z         |
|---------------|-----------|-----------|-----------|
| 6             | -2.850422 | 2.57176   | -0.343367 |
| 6             | -1.715871 | 3.387719  | -0.39848  |
| 6             | -0.561783 | 2.544284  | -0.222781 |
| 7             | -1.001882 | 1.244043  | -0.089146 |
| 6             | -2.398598 | 1.217552  | -0.143274 |
| 6             | -2.398516 | -1.217747 | 0.142794  |
| 6             | -2.85024  | -2.571989 | 0.343041  |
| 7             | -1.001811 | -1.24417  | 0.088474  |
| 6             | -1.715646 | -3.387876 | 0.398025  |
| 6             | -0.561612 | -2.544359 | 0.222159  |
| 6             | -3.089997 | -0.000123 | -0.000163 |
| 5             | -0.097265 | -0.00004  | -0.000487 |
| 9             | 0.757523  | -0.079599 | -1.158638 |
| 9             | 0.757844  | 0.079526  | 1.157472  |
| 6             | -4.581159 | -0.000127 | 0.000067  |
| 6             | -5.316651 | 0.447924  | 1.10194   |
| 6             | -5.317008 | -0.448144 | -1.101589 |

|   |           |           |           |
|---|-----------|-----------|-----------|
| 6 | -6.70844  | 0.453434  | 1.114196  |
| 6 | -6.708798 | -0.453592 | -1.113427 |
| 6 | -7.40853  | -0.000059 | 0.00049   |
| 9 | -4.659878 | -0.925528 | -2.215099 |
| 9 | -7.394878 | -0.910242 | -2.214205 |
| 9 | -8.781574 | -0.000024 | 0.000698  |
| 9 | -7.394165 | 0.910118  | 2.21518   |
| 9 | -4.659168 | 0.925287  | 2.215254  |
| 6 | -4.268299 | -3.053518 | 0.459441  |
| 1 | -4.861408 | -2.440802 | 1.145547  |
| 1 | -4.77779  | -3.055098 | -0.512356 |
| 1 | -4.300027 | -4.078616 | 0.836737  |
| 6 | -4.268501 | 3.053274  | -0.459583 |
| 1 | -4.861849 | 2.440231  | -1.145178 |
| 1 | -4.777697 | 3.055385  | 0.512374  |
| 1 | -4.300293 | 4.078181  | -0.83741  |
| 6 | -1.716978 | -4.887104 | 0.547688  |
| 1 | -2.672986 | -5.207827 | 0.977015  |
| 1 | -0.958252 | -5.196512 | 1.276549  |
| 6 | -1.500636 | -5.642003 | -0.784943 |
| 1 | -1.495977 | -6.726357 | -0.622033 |
| 1 | -2.301831 | -5.406366 | -1.494005 |
| 1 | -0.550944 | -5.360494 | -1.250903 |
| 6 | -1.717348 | 4.886939  | -0.548174 |
| 1 | -2.673354 | 5.207557  | -0.977596 |
| 1 | -0.958576 | 5.19639   | -1.276956 |
| 6 | -1.50122  | 5.641908  | 0.784454  |
| 1 | -1.496687 | 6.726253  | 0.621495  |
| 1 | -2.302463 | 5.406186  | 1.49344   |
| 1 | -0.551539 | 5.360539  | 1.250523  |
| 6 | 0.842062  | 2.833205  | -0.124692 |
| 6 | 1.469997  | 4.02198   | -0.354346 |
| 1 | 1.442907  | 1.988237  | 0.186616  |
| 1 | 0.893827  | 4.884329  | -0.672592 |
| 6 | 0.842249  | -2.833193 | 0.124099  |
| 6 | 1.470259  | -4.021845 | 0.354178  |
| 1 | 1.44302   | -1.988277 | -0.187486 |
| 1 | 0.894116  | -4.88411  | 0.67271   |
| 6 | 2.895053  | 4.275171  | -0.221161 |
| 6 | 3.400314  | 5.562371  | -0.514943 |
| 6 | 3.835619  | 3.303851  | 0.198098  |
| 6 | 4.748922  | 5.874714  | -0.402053 |
| 1 | 2.709223  | 6.33546   | -0.841033 |
| 6 | 5.185632  | 3.598799  | 0.317596  |
| 1 | 3.503698  | 2.299173  | 0.437119  |
| 6 | 5.685151  | 4.896237  | 0.0207    |
| 1 | 5.076085  | 6.878302  | -0.641371 |
| 1 | 5.860472  | 2.81857   | 0.645247  |
| 6 | 2.895333  | -4.274998 | 0.221145  |
| 6 | 3.400636  | -5.562113 | 0.515231  |
| 6 | 3.835881  | -3.303712 | -0.198237 |
| 6 | 4.74926   | -5.874422 | 0.402449  |
| 1 | 2.709566  | -6.335161 | 0.841461  |
| 6 | 5.18591   | -3.598626 | -0.317624 |



|   |          |           |           |
|---|----------|-----------|-----------|
| 1 | 3.503935 | -2.299069 | -0.437374 |
| 6 | 5.685464 | -4.895997 | -0.020487 |
| 1 | 5.076459 | -6.877944 | 0.641993  |
| 1 | 5.860737 | -2.818422 | -0.645358 |
| 7 | 7.035308 | 5.192537  | 0.140598  |
| 7 | 7.035628 | -5.192283 | -0.140313 |
| 6 | 7.979721 | 4.165833  | 0.579983  |
| 1 | 7.993957 | 3.306477  | -0.1045   |
| 1 | 8.983582 | 4.59177   | 0.607832  |
| 1 | 7.739763 | 3.794759  | 1.585959  |
| 6 | 7.521967 | 6.536735  | -0.166962 |
| 1 | 7.320141 | 6.813611  | -1.211039 |
| 1 | 7.059654 | 7.294898  | 0.480294  |
| 1 | 8.600921 | 6.572108  | -0.010668 |
| 6 | 7.52237  | -6.536329 | 0.167791  |
| 1 | 8.6013   | -6.571748 | 0.011337  |
| 1 | 7.320695 | -6.812765 | 1.212019  |
| 1 | 7.059982 | -7.294768 | -0.479078 |
| 6 | 7.980059 | -4.165553 | -0.579611 |
| 1 | 7.99432  | -3.306238 | 0.104927  |
| 1 | 8.983908 | -4.591514 | -0.607523 |
| 1 | 7.740083 | -3.794418 | -1.585554 |

#### 4d.2H<sup>+</sup>

| Atomic number | X         | Y         | Z         |
|---------------|-----------|-----------|-----------|
| 6             | 0         | 0         | 0         |
| 6             | 0         | 0         | 1.392124  |
| 6             | 1.368392  | 0         | 1.810783  |
| 7             | 2.176942  | 0.025468  | 0.714825  |
| 6             | 1.376451  | -0.003607 | -0.416704 |
| 6             | 3.351762  | 0.029213  | -1.869171 |
| 6             | 4.160535  | -0.003588 | -3.05945  |
| 7             | 4.191232  | 0.141877  | -0.771874 |
| 6             | 5.48743   | 0.09357   | -2.650949 |
| 6             | 5.479948  | 0.184049  | -1.218528 |
| 6             | 1.955756  | -0.026053 | -1.698447 |
| 5             | 3.736872  | -0.018794 | 0.718459  |
| 9             | 4.231265  | 1.047446  | 1.487774  |
| 9             | 4.191862  | -1.22042  | 1.232766  |
| 6             | 1.06775   | -0.102978 | -2.893131 |
| 6             | 0.421658  | -1.291729 | -3.24274  |
| 6             | 0.841081  | 1.012857  | -3.703152 |
| 6             | -0.410369 | -1.376172 | -4.355848 |
| 6             | 0.009334  | 0.956397  | -4.817757 |
| 6             | -0.618149 | -0.245444 | -5.145581 |
| 9             | 1.457329  | 2.171016  | -3.427291 |
| 9             | -0.177686 | 2.036951  | -5.575106 |
| 9             | -1.41245  | -0.313023 | -6.208451 |
| 9             | -1.016442 | -2.523728 | -4.658937 |
| 9             | 0.57839   | -2.383393 | -2.481612 |
| 6             | 3.697029  | -0.106423 | -4.483451 |
| 1             | 2.930749  | -0.874541 | -4.613636 |
| 1             | 3.281928  | 0.843352  | -4.83955  |

|   |           |           |           |
|---|-----------|-----------|-----------|
| 1 | 4.526407  | -0.36216  | -5.145593 |
| 6 | -1.236331 | 0.019645  | -0.850035 |
| 1 | -1.169151 | 0.73942   | -1.669855 |
| 1 | -1.43599  | -0.965262 | -1.287833 |
| 1 | -2.109201 | 0.285832  | -0.249143 |
| 6 | 6.678734  | 0.172627  | -3.572126 |
| 1 | 6.381083  | -0.174431 | -4.565345 |
| 1 | 7.4584    | -0.531076 | -3.25851  |
| 6 | 7.26319   | 1.591797  | -3.710539 |
| 1 | 8.118797  | 1.589368  | -4.394418 |
| 1 | 6.512309  | 2.279552  | -4.112428 |
| 1 | 7.595783  | 1.991487  | -2.747159 |
| 6 | -1.22533  | 0.065766  | 2.266245  |
| 1 | -1.95333  | 0.743365  | 1.804774  |
| 1 | -0.969204 | 0.5258    | 3.226389  |
| 6 | -1.907706 | -1.295988 | 2.50061   |
| 1 | -2.787205 | -1.181022 | 3.14326   |
| 1 | -2.238186 | -1.738406 | 1.555344  |
| 1 | -1.230755 | -2.018402 | 2.97202   |
| 6 | 1.917309  | 0.029337  | 3.148964  |
| 6 | 1.278122  | -0.456386 | 4.242027  |
| 1 | 2.910603  | 0.460681  | 3.231873  |
| 1 | 0.334333  | -0.972526 | 4.104928  |
| 6 | 6.564846  | 0.35509   | -0.27841  |
| 6 | 7.883798  | 0.188154  | -0.550572 |
| 1 | 6.252095  | 0.652453  | 0.717285  |
| 1 | 8.180305  | -0.155038 | -1.533545 |
| 6 | 1.72541   | -0.395789 | 5.628239  |
| 6 | 0.970005  | -1.08527  | 6.602801  |
| 6 | 2.84724   | 0.337396  | 6.06977   |
| 6 | 1.300243  | -1.04986  | 7.951524  |
| 1 | 0.101355  | -1.657418 | 6.291376  |
| 6 | 3.190794  | 0.381536  | 7.416459  |
| 1 | 3.446697  | 0.89365   | 5.357205  |
| 6 | 2.412428  | -0.308759 | 8.34545   |
| 1 | 0.687948  | -1.590756 | 8.667063  |
| 1 | 4.054363  | 0.964128  | 7.732932  |
| 6 | 9.00457   | 0.427751  | 0.348801  |
| 6 | 10.302147 | 0.115767  | -0.111101 |
| 6 | 8.886886  | 0.986917  | 1.641547  |
| 6 | 11.429578 | 0.35415   | 0.665235  |
| 1 | 10.42649  | -0.316688 | -1.099135 |
| 6 | 10.00536  | 1.231384  | 2.429129  |
| 1 | 7.908733  | 1.249115  | 2.030223  |
| 6 | 11.270299 | 0.914943  | 1.928953  |
| 1 | 12.415569 | 0.106715  | 0.276093  |
| 1 | 9.87864   | 1.673615  | 3.413258  |
| 7 | 2.782727  | -0.226571 | 9.787628  |
| 7 | 12.494729 | 1.189176  | 2.734805  |
| 6 | 3.172575  | -1.564654 | 10.374772 |
| 1 | 3.95864   | -1.994679 | 9.754111  |
| 1 | 3.522938  | -1.410925 | 11.397038 |
| 1 | 2.297129  | -2.213222 | 10.371346 |
| 6 | 1.732275  | 0.467931  | 10.627203 |

|   |           |           |           |
|---|-----------|-----------|-----------|
| 1 | 1.524253  | 1.439804  | 10.17964  |
| 1 | 0.83076   | -0.143833 | 10.629545 |
| 1 | 2.113914  | 0.581391  | 11.643525 |
| 6 | 12.553984 | 0.391291  | 4.016768  |
| 1 | 13.51939  | 0.566174  | 4.49517   |
| 1 | 11.745563 | 0.722475  | 4.667801  |
| 1 | 12.429238 | -0.663033 | 3.769557  |
| 6 | 12.721578 | 2.664646  | 2.979119  |
| 1 | 11.910977 | 3.040606  | 3.602593  |
| 1 | 13.680235 | 2.793948  | 3.484858  |
| 1 | 12.719942 | 3.174559  | 2.015705  |
| 1 | 13.280924 | 0.868663  | 2.159463  |
| 1 | 3.620117  | 0.36346   | 9.827995  |

**4e**

| Atomic number | X         | Y         | Z         |
|---------------|-----------|-----------|-----------|
| 6             | 0         | 0         | 0         |
| 6             | 0         | 0         | 1.392333  |
| 6             | 1.368877  | 0         | 1.813341  |
| 7             | 2.17004   | 0.004184  | 0.716559  |
| 6             | 1.376182  | -0.008378 | -0.420083 |
| 6             | 3.366911  | -0.024429 | -1.856897 |
| 6             | 4.199159  | -0.025226 | -3.030681 |
| 7             | 4.195304  | -0.059473 | -0.745652 |
| 6             | 5.520489  | -0.043546 | -2.592112 |
| 6             | 5.488661  | -0.062112 | -1.160426 |
| 6             | 1.969282  | -0.010818 | -1.695896 |
| 5             | 3.730386  | -0.035097 | 0.744402  |
| 9             | 4.223448  | 1.101898  | 1.375582  |
| 9             | 4.163383  | -1.184697 | 1.396469  |
| 6             | 3.777973  | -0.015024 | -4.47164  |
| 1             | 2.9997    | -0.75333  | -4.686181 |
| 1             | 3.394401  | 0.967341  | -4.772389 |
| 1             | 4.629568  | -0.238104 | -5.119573 |
| 6             | -1.234841 | 0.012768  | -0.853737 |
| 1             | -1.18629  | 0.761403  | -1.649998 |
| 1             | -1.408559 | -0.961774 | -1.325645 |
| 1             | -2.116007 | 0.235969  | -0.246676 |
| 6             | 6.744609  | -0.096954 | -3.467504 |
| 1             | 6.535226  | -0.724348 | -4.342582 |
| 1             | 7.554118  | -0.603723 | -2.931241 |
| 6             | 7.227485  | 1.281755  | -3.957724 |
| 1             | 8.127076  | 1.181208  | -4.575288 |
| 1             | 6.457441  | 1.777026  | -4.559174 |
| 1             | 7.461366  | 1.950022  | -3.121159 |
| 6             | -1.215983 | 0.053283  | 2.279003  |
| 1             | -1.974477 | 0.694154  | 1.812962  |
| 1             | -0.95732  | 0.54517   | 3.222847  |
| 6             | -1.846498 | -1.323382 | 2.564616  |
| 1             | -2.715089 | -1.223282 | 3.225141  |
| 1             | -2.179337 | -1.803304 | 1.63785   |
| 1             | -1.132655 | -2.00483  | 3.041248  |
| 6             | 1.096004  | 0.001362  | -2.905982 |

|   |           |           |           |
|---|-----------|-----------|-----------|
| 6 | 0.438416  | -1.15175  | -3.341166 |
| 6 | 0.901294  | 1.166367  | -3.651855 |
| 6 | -0.378261 | -1.153699 | -4.468941 |
| 6 | 0.088447  | 1.191055  | -4.782127 |
| 6 | -0.55364  | 0.024383  | -5.19192  |
| 9 | -0.06906  | 2.320362  | -5.478681 |
| 9 | 1.527299  | 2.297723  | -3.300714 |
| 9 | -1.333904 | 0.035272  | -6.273146 |
| 9 | -1.000433 | -2.272127 | -4.852803 |
| 9 | 0.56355   | -2.293592 | -2.651462 |
| 6 | 6.557458  | -0.160134 | -0.186622 |
| 6 | 7.824813  | 0.278752  | -0.383705 |
| 1 | 6.277086  | -0.601343 | 0.759588  |
| 1 | 8.059322  | 0.783766  | -1.315653 |
| 6 | 8.968282  | 0.225271  | 0.524471  |
| 6 | 8.96973   | -0.433882 | 1.7947    |
| 6 | 10.14687  | 0.85802   | 0.120614  |
| 6 | 10.153924 | -0.404905 | 2.581047  |
| 6 | 11.289946 | 0.86428   | 0.921767  |
| 1 | 10.1877   | 1.364413  | -0.836688 |
| 6 | 11.31444  | 0.241513  | 2.154523  |
| 1 | 12.20093  | 0.248868  | 2.773475  |
| 7 | 12.497622 | 1.547851  | 0.443965  |
| 8 | 13.4853   | 1.537947  | 1.176444  |
| 8 | 12.443776 | 2.087009  | -0.661329 |
| 7 | 10.203045 | -1.061247 | 3.879323  |
| 8 | 11.238563 | -1.016622 | 4.526043  |
| 8 | 9.17582   | -1.65107  | 4.285645  |
| 6 | 1.957132  | 0.075071  | 3.135675  |
| 6 | 1.366617  | -0.373384 | 4.270498  |
| 1 | 2.947553  | 0.506607  | 3.173501  |
| 1 | 0.403593  | -0.868465 | 4.192781  |
| 6 | 1.868596  | -0.342705 | 5.642448  |
| 6 | 3.07974   | 0.299791  | 6.052684  |
| 6 | 1.107982  | -0.981409 | 6.625333  |
| 6 | 3.452475  | 0.249253  | 7.423817  |
| 6 | 1.507949  | -1.009047 | 7.962409  |
| 1 | 0.181913  | -1.475661 | 6.355815  |
| 6 | 2.675911  | -0.402636 | 8.382236  |
| 1 | 2.983821  | -0.42653  | 9.418403  |
| 7 | 4.675165  | 0.888151  | 7.888102  |
| 8 | 4.962077  | 0.825254  | 9.07396   |
| 8 | 5.390039  | 1.482405  | 7.049058  |
| 7 | 0.667523  | -1.697889 | 8.948934  |
| 8 | 1.051448  | -1.706982 | 10.117117 |
| 8 | -0.369438 | -2.222098 | 8.542508  |
| 8 | 3.805337  | 0.924186  | 5.134364  |
| 1 | 4.600157  | 1.305191  | 5.59367   |
| 8 | 7.863601  | -1.052882 | 2.185837  |
| 1 | 8.045326  | -1.447309 | 3.079858  |

<sup>1</sup> Catalan, J. J. *Phys. Chem. B* **2009**, *113*, 5951.
